# Supplementary material for: Rapid and reliable distinguish of Morinda officinalis How by loop-mediated isothermal amplification (LAMP) assay
Source: Research Square preprint supplement (doi:10.21203/rs.3.rs-120446/v1), 2020-12-10
Supplement: Supplementary file 1 [file 01c5099f2e3540466ff447bd.xlsx]

## Sheet: Sheet1
data from Fig.3b
time(min)	Turbidity
	1	2	3	4	5	6	7	8	9	10	11	12	13	14	15	16
00:00:06	0	0	0	0	0	0	0	0	0	0	0	0	0	0	0	0
00:00:12	0	0	0	0	0	0	0	0	0	0	0	0	0	0	0	0
00:00:18	0	0	0	0	0	0	0	0	0	0	0	0	0	0	0	0
00:00:24	0	0	0	0	0	0	0	0	0	0	0	0	0	0	0	0
00:00:30	0	0	0	0	0	0	0	0	0	0	0	0	0	0	0	0
00:00:36	0	0	0	0	0	0	0	0	0	0	0	0	0	0	0	0
00:00:42	0	0	0	0	0	0	0	0	0	0	0	0	0	0	0	0
00:00:48	0	0	0	0	0	0	0	0	0	0	0	0	0	0	0	0
00:00:54	0	0	0	0	0	0	0	0	0	0	0	0	0	0	0	0
00:01:00	0	0	0	0	0	0	0	0	0	0	0	0	0	0	0	0
00:01:06	0	0	0	0	0	0	0	0	0	0	0	0	0	0	0	0
00:01:12	0	0	0	0	0	0	0	0	0	0	0	0	0	0	0	0
00:01:18	0	0	0	0	0	0	0	0	0	0	0	0	0	0	0	0
00:01:24	0	0	0	0	0	0	0	0	0	0	0	0	0	0	0	0
00:01:30	0	0	0	0	0	0	0	0	0	0	0	0	0	0	0	0
00:01:36	0	0	0	0	0	0	0	0	0	0	0	0	0	0	0	0
00:01:42	0	0	0	0	0	0	0	0	0	0	0	0	0	0	0	0
00:01:48	0	0	0	0	0	0	0	0	0	0	0	0	0	0	0	0
00:01:54	0	0	0	0	0	0	0	0	0	0	0	0	0	0	0	0
00:02:00	0	0	0	0	0	0	0	0	0	0	0	0	0	0	0	0
00:02:06	0	0	0	0	0	0	0	0	0	0	0	0	0	0	0	0
00:02:12	0	0	0	0	0	0	0	0	0	0	0	0	0	0	0	0
00:02:18	0	0	0	0	0	0	0	0	0	0	0	0	0	0	0	0
00:02:24	0	0	0	0	0	0	0	0	0	0	0	0	0	0	0	0
00:02:30	0	0	0	0	0	0	0	0	0	0	0	0	0	0	0	0
00:02:36	0	0	0	0	0	0	0	0	0	0	0	0	0	0	0	0
00:02:42	0	0	0	0	0	0	0	0	0	0	0	0	0	0	0	0
00:02:48	0	0	0	0	0	0	0	0	0	0	0	0	0	0	0	0
00:02:54	0	0	0	0	0	0	0	0	0	0	0	0	0	0	0	0
00:03:00	0	0	0	0	0	0	0	0	0	0	0	0	0	0	0	0
00:03:06	0	0	0	0	0	0	0	0	0	0	0	0	0	0	0	0
00:03:12	0	0	0	0	0	0	0	0	0	0	0	0	0	0	0	0
00:03:18	0	0	0	0	0	0	0	0	0	0	0	0	0	0	0	0
00:03:24	0	0	0	0	0	0	0	0	0	0	0	0	0	0	0	0
00:03:30	0	0	0	0	0	0	0	0	0	0	0	0	0	0	0	0
00:03:36	0	0	0	0	0	0	0	0	0	0	0	0	0	0	0	0
00:03:42	0	0	0	0	0	0	0	0	0	0	0	0	0	0	0	0
00:03:48	0	0	0	0	0	0	0	0	0	0	0	0	0	0	0	0
00:03:54	0	0	0	0	0	0	0	0	0	0	0	0	0	0	0	0
00:04:00	0	0	0	0	0	0	0	0	0	0	0	0	0	0	0	0
00:04:06	0	0	0	0	0	0	0	0	0	0	0	0	0	0	0	0
00:04:12	0	0	0	0	0	0	0	0	0	0	0	0	0	0	0	0
00:04:18	0	0	0	0	0	0	0	0	0	0	0	0	0	0	0	0
00:04:24	0	0	0	0	0	0	0	0	0	0	0	0	0	0	0	0
00:04:30	0	0	0	0	0	0	0	0	0	0	0	0	0	0	0	0
00:04:36	0	0	0	0	0	0	0	0	0	0	0	0	0	0	0	0
00:04:42	0	0	0	0	0	0	0	0	0	0	0	0	0	0	0	0
00:04:48	0	0	0	0	0	0	0	0	0	0	0	0	0	0	0	0
00:04:54	0	0	0	0	0	0	0	0	0	0	0	0	0	0	0	0
00:05:00	0	0	0	0	0	0	0	0	0	0	0	0	0	0	0	0
00:05:06	0	0	0	0	0	0	0	0	0	0	0	0	0	0	0	0
00:05:12	0	0	0	0	0	0	0	0	0	0	0	0	0	0	0	0
00:05:18	0	0	0	0	0	0	0	0	0	0	0	0	0	0	0	0
00:05:24	0	0	0	0	0	0	0	0	0	0	0	0	0	0	0	0
00:05:30	0	0	0	0	0	0	0	0	0	0	0	0	0	0	0	0
00:05:36	0	0	0	0	0	0	0	0	0	0	0	0	0	0	0	0
00:05:42	0	0	0	0	0	0	0	0	0	0	0	0	0	0	0	0
00:05:48	0	0	0	0	0	0	0	0	0	0	0	0	0	0	0	0
00:05:54	0	0	0	0	0	0	0	0	0	0	0	0	0	0	0	0
00:06:00	0	0	0	0	0	0	0	0	0	0	0	0	0	0	0	0
00:06:06	0	0	0	0	0	0	0	0	0	0	0	0	0	0	0	0
00:06:12	0	0	0	0	0	0	0	0	0	0	0	0	0	0	0	0
00:06:18	0	0	0	0	0	0	0	0	0	0	0	0	0	0	0	0
00:06:24	0	0	0	0	0	0	0	0	0	0	0	0	0	0	0	0
00:06:30	0	0	0	0	0	0	0	0	0	0	0	0	0	0	0	0
00:06:36	0	0	0	0	0	0	0	0	0	0	0	0	0	0	0	0
00:06:42	0	0	0	0	0	0	0	0	0	0	0	0	0	0	0	0
00:06:48	0	0	0	0	0	0	0	0	0	0	0	0	0	0	0	0
00:06:54	0	0	0	0	0	0	0	0	0	0	0	0	0	0	0	0
00:07:00	0	0	0	0	0	0	0	0	0	0	0	0	0	0	0	0
00:07:06	0	0	0	0	0	0	0	0	0	0	0	0	0	0	0	0
00:07:12	0	0	0	0	0	0	0	0	0	0	0	0	0	0	0	0
00:07:18	0	0	0	0	0	0	0	0	0	0	0	0	0	0	0	0
00:07:24	0	0	0	0	0	0	0	0	0	0	0	0	0	0	0	0
00:07:30	0	0	0	0	0	0	0	0	0	0	0	0	0	0	0	0
00:07:36	0	0	0	0	0	0	0	0	0	0	0	0	0	0	0	0
00:07:42	0	0	0	0	0	0	0	0	0	0	0	0	0	0	0	0
00:07:48	0	0	0	0	0	0	0	0	0	0	0	0	0	0	0	0
00:07:54	0	0	0	0	0	0	0	0	0	0	0	0	0	0	0	0
00:08:00	0	0	0	0	0	0	0	0	0	0	0	0	0	0	0	0
00:08:06	0	0	0	0	0	0	0	0	0	0	0	0	0	0	0	0
00:08:12	0	0	0	0	0	0	0	0	0	0	0	0	0	0	0	0
00:08:18	0	0	0	0	0	0	0	0	0	0	0	0	0	0	0	0
00:08:24	0	0	0	0	0	0	0	0	0	0	0	0	0	0	0	0
00:08:30	0	0	0	0	0	0	0	0	0	0	0	0	0	0	0	0
00:08:36	0	0	0	0	0	0	0	0	0	0	0	0	0	0	0	0
00:08:42	0	0	0	0	0	0	0	0	0	0	0	0	0	0	0	0
00:08:48	0	0	0	0	0	0	0	0	0	0	0	0	0	0	0	0
00:08:54	0	0	0	0	0	0	0	0	0	0	0	0	0	0	0	0
00:09:00	0	0	0	0	0	0	0	0	0	0	0	0	0	0	0	0
00:09:06	0	0	0	0	0	0	0	0	0	0	0	0	0	0	0	0
00:09:12	0	0	0	0	0	0	0	0	0	0	0	0	0	0	0	0
00:09:18	0	0	0	0	0	0	0	0	0	0	0	0	0	0	0	0
00:09:24	0	0	0	0	0	0	0	0	0	0	0	0	0	0	0	0
00:09:30	0	0	0	0	0	0	0	0	0	0	0	0	0	0	0	0
00:09:36	0	0	0	0	0	0	0	0	0	0	0	0	0	0	0	0
00:09:42	0	0	0	0	0	0	0	0	0	0	0	0	0	0	0	0
00:09:48	0	0	0	0	0	0	0	0	0	0	0	0	0	0	0	0
00:09:54	0	0	0	0	0	0	0	0	0	0	0	0	0	0	0	0
00:10:00	0	0	0	0	0	0	0	0	0	0	0	0	0	0	0	0
00:10:06	0	0	0	0	0	0	0	0	0	0	0	0	0	0	0	0
00:10:12	0	0	0	0	0	0	0	0	0	0	0	0	0	0	0	0
00:10:18	0	0	0	0	0	0	0	0	0	0	0	0	0	0	0	0
00:10:24	0	0	0	0	0	0	0	0	0	0	0	0	0	0	0	0
00:10:30	0	0	0	0	0	0	0	0	0	0	0	0	0	0	0	0
00:10:36	0	0	0	0	0	0	0	0	0	0	0	0	0	0	0	0
00:10:42	0	0	0	0	0	0	0	0	0	0	0	0	0	0	0	0
00:10:48	0	0	0	0	0	0	0	0	0	0	0	0	0	0	0	0
00:10:54	0	0	0	0	0	0	0	0	0	0	0	0	0	0	0	0
00:11:00	0	0	0	0	0	0	0	0	0	0	0	0	0	0	0	0
00:11:06	0	0	0	0	0	0	0	0	0	0	0	0	0	0	0	0
00:11:12	0	0	0	0	0	0	0	0	0	0	0	0	0	0	0	0
00:11:18	0	0	0	0	0	0	0	0	0	0	0	0	0	0	0	0
00:11:24	0	0	0	0	0	0	0	0	0	0	0	0	0	0	0	0
00:11:30	0	0	0	0	0	0	0	0	0	0	0	0	0	0	0	0
00:11:36	0	0	0	0	0	0	0	0	0	0	0	0	0	0	0	0
00:11:42	0	0	0	0	0	0	0	0	0	0	0	0	0	0	0	0
00:11:48	0	0	0	0	0	0	0	0	0	0	0	0	0	0	0	0
00:11:54	0	0	0	0	0	0	0	0	0	0	0	0	0	0	0	0
00:12:00	0	0	0	0	0	0	0	0	0	0	0	0	0	0	0	0
00:12:06	0	0	0	0	0	0	0	0	0	0	0	0	0	0	0	0
00:12:12	0	0	0	0	0	0	0	0	0	0	0	0	0	0	0	0
00:12:18	0	0	0	0	0	0	0	0	0	0	0	0	0	0	0	0
00:12:24	0	0	0	0	0	0	0	0	0	0	0	0	0	0	0	0
00:12:30	0	0	0	0	0	0	0	0	0	0	0	0	0	0	0	0
00:12:36	0	0	0	0	0	0	0	0	0	0	0	0	0	0	0	0
00:12:42	0	0	0	0	0	0	0	0	0	0	0	0	0	0	0	0
00:12:48	0	0	0	0	0	0	0	0	0	0	0	0	0	0	0	0
00:12:54	0	0	0	0	0	0	0	0	0	0	0	0	0	0	0	0
00:13:00	0	0	0	0	0	0	0	0	0	0	0	0	0	0	0	0
00:13:06	0	0.0001	0	0	0	0	0	0	0	0	0	0	0	0	0	0
00:13:12	0	0.0006	0	0	0	0	0	0	0	0	0	0	0	0	0	0
00:13:18	0	0.0008	0	0	0	0	0	0	0	0	0	0	0	0	0	0
00:13:24	0	0.0009	0	0	0	0	0	0	0	0	0	0	0	0	0	0
00:13:30	0	0.0009	0.0001	0	0	0	0	0	0	0	0	0	0	0	0	0
00:13:36	0	0.0011	0.0001	0	0	0	0	0	0	0	0	0	0	0	0	0
00:13:42	0	0.0014	0.0004	0	0	0	0	0	0	0	0	0	0	0	0	0
00:13:48	0	0.0015	0.0005	0	0	0	0	0	0	0	0	0	0	0	0	0
00:13:54	0	0.0018	0.0006	0	0	0	0	0	0	0	0	0	0	0	0	0
00:14:00	0	0.0019	0.0009	0	0	0	0	0	0	0	0	0	0	0	0	0
00:14:06	0	0.0021	0.0012	0	0	0	0	0	0	0	0	0	0	0	0	0
00:14:12	0	0.0022	0.0013	0	0	0	0	0	0	0	0	0	0	0	0	0
00:14:18	0	0.0023	0.0015	0	0	0	0	0	0	0	0	0	0	0	0	0
00:14:24	0	0.0024	0.0015	0	0	0	0	0	0	0	0	0	0	0	0	0
00:14:30	0	0.0024	0.0016	0	0	0	0	0	0	0	0	0	0	0	0	0
00:14:36	0	0.0025	0.0018	0	0	0	0	0	0	0	0	0	0	0	0	0
00:14:42	0.0001	0.0026	0.0026	0	0	0	0	0	0	0	0	0	0	0	0	0
00:14:48	0.0001	0.0032	0.0027	0	0	0	0	0	0	0	0	0	0	0	0	0
00:14:54	0.0001	0.0034	0.0028	0	0	0	0.0003	0	0	0	0	0	0	0	0	0
00:15:00	0.0001	0.0038	0.0029	0	0	0	0.0006	0	0	0	0	0	0	0	0	0
00:15:06	0.0001	0.0038	0.003	0.0001	0	0	0.0006	0	0	0	0	0	0	0	0	0
00:15:12	0.0001	0.0039	0.0033	0.0003	0	0	0.0008	0	0	0	0	0	0	0	0	0
00:15:18	0.0001	0.0039	0.0033	0.0005	0	0	0.0009	0	0	0	0	0	0	0	0	0
00:15:24	0.0001	0.0043	0.0035	0.0007	0	0	0.0011	0	0	0	0	0	0	0	0	0
00:15:30	0.0001	0.0066	0.0036	0.0007	0	0	0.0014	0	0	0	0	0	0	0	0	0
00:15:36	0.0001	0.0097	0.004	0.0008	0.0001	0	0.002	0	0	0	0	0	0	0	0	0
00:15:42	0.0001	0.0127	0.0041	0.0008	0.0002	0.0001	0.0026	0	0	0	0	0	0	0	0	0
00:15:48	0.0001	0.0176	0.0042	0.001	0.0004	0.0004	0.003	0	0	0	0	0	0	0	0	0
00:15:54	0.0001	0.0236	0.0043	0.001	0.0004	0.0004	0.0032	0	0	0	0	0	0	0	0	0
00:16:00	0.0001	0.0298	0.0049	0.0011	0.0005	0.0007	0.0034	0	0	0	0	0	0	0	0	0
00:16:06	0.0002	0.0344	0.0066	0.0011	0.0007	0.0008	0.0034	0	0	0	0	0	0	0	0	0
00:16:12	0.0002	0.0383	0.0097	0.0012	0.0007	0.0009	0.0036	0	0	0	0	0	0	0	0	0
00:16:18	0.0003	0.0423	0.0125	0.0014	0.001	0.001	0.0037	0	0	0	0	0	0	0	0	0
00:16:24	0.0003	0.0501	0.0172	0.0014	0.0013	0.0011	0.0039	0	0	0	0	0	0	0	0	0
00:16:30	0.0003	0.0575	0.0229	0.0016	0.0017	0.0011	0.0041	0	0	0	0	0	0	0	0	0
00:16:36	0.0003	0.0667	0.0296	0.0017	0.0018	0.0012	0.0043	0	0	0	0	0	0	0	0	0
00:16:42	0.0004	0.0742	0.0335	0.0017	0.002	0.0012	0.0043	0	0	0	0	0	0	0	0	0
00:16:48	0.0004	0.0802	0.0409	0.0026	0.0021	0.0013	0.0044	0	0	0	0	0	0	0	0	0
00:16:54	0.0004	0.086	0.0488	0.0049	0.0029	0.0014	0.0053	0	0	0.0001	0	0	0	0	0.0001	0
00:17:00	0.0004	0.0961	0.0532	0.0134	0.003	0.0017	0.0053	0	0	0.0001	0	0	0	0	0.0001	0
00:17:06	0.0004	0.1005	0.0588	0.0207	0.0031	0.002	0.0056	0	0	0.0001	0	0	0	0	0.0001	0
00:17:12	0.0005	0.1082	0.0639	0.025	0.0033	0.0021	0.006	0.0001	0	0.0001	0	0	0	0.0001	0.0001	0
00:17:18	0.0005	0.1175	0.0678	0.0294	0.0033	0.0021	0.0064	0.0001	0.0001	0.0001	0.0001	0.0001	0	0.0001	0.0001	0.0001
00:17:24	0.0005	0.1237	0.0718	0.0335	0.0033	0.0024	0.0065	0.0001	0.0001	0.0001	0.0001	0.0001	0	0.0001	0.0001	0.0001
00:17:30	0.0005	0.1286	0.0781	0.0351	0.0036	0.0027	0.0076	0.0001	0.0001	0.0002	0.0001	0.0001	0	0.0001	0.0001	0.0001
00:17:36	0.0005	0.1326	0.0801	0.0423	0.0037	0.0029	0.0078	0.0001	0.0001	0.0002	0.0001	0.0001	0	0.0001	0.0001	0.0001
00:17:42	0.0006	0.1368	0.0865	0.049	0.0056	0.003	0.0183	0.0001	0.0001	0.0002	0.0001	0.0001	0	0.0001	0.0001	0.0001
00:17:48	0.0006	0.1406	0.0947	0.0556	0.0076	0.0032	0.0215	0.0001	0.0001	0.0002	0.0001	0.0002	0	0.0001	0.0001	0.0001
00:17:54	0.0006	0.1438	0.1059	0.066	0.0123	0.0033	0.0274	0.0001	0.0001	0.0002	0.0001	0.0003	0	0.0002	0.0001	0.0001
00:18:00	0.0006	0.148	0.1173	0.07	0.0148	0.0034	0.0339	0.0002	0.0002	0.0002	0.0002	0.0003	0	0.0002	0.0002	0.0001
00:18:06	0.0006	0.1533	0.1235	0.0811	0.0177	0.0034	0.0407	0.0002	0.0002	0.0002	0.0002	0.0003	0	0.0002	0.0002	0.0001
00:18:12	0.0006	0.156	0.1306	0.089	0.0308	0.0038	0.0489	0.0002	0.0002	0.0002	0.0002	0.0003	0.0001	0.0002	0.0002	0.0002
00:18:18	0.0006	0.1627	0.1392	0.0977	0.0354	0.0039	0.0523	0.0002	0.0003	0.0003	0.0003	0.0004	0.0001	0.0002	0.0002	0.0002
00:18:24	0.0006	0.1771	0.1443	0.1065	0.0408	0.004	0.0645	0.0002	0.0003	0.0003	0.0003	0.0004	0.0001	0.0002	0.0002	0.0002
00:18:30	0.0007	0.1803	0.1461	0.1135	0.0463	0.0043	0.0737	0.0002	0.0003	0.0003	0.0003	0.0004	0.0001	0.0002	0.0002	0.0002
00:18:36	0.0007	0.1835	0.1517	0.1209	0.0516	0.0072	0.0857	0.0002	0.0004	0.0003	0.0003	0.0004	0.0001	0.0003	0.0002	0.0002
00:18:42	0.0007	0.1848	0.1607	0.126	0.0597	0.0112	0.0885	0.0003	0.0004	0.0003	0.0003	0.0004	0.0001	0.0003	0.0003	0.0002
00:18:48	0.0007	0.1906	0.1633	0.1316	0.0636	0.0184	0.0994	0.0004	0.0004	0.0004	0.0003	0.0004	0.0001	0.0003	0.0003	0.0002
00:18:54	0.0007	0.1986	0.1702	0.1389	0.0748	0.0242	0.104	0.0004	0.0004	0.0004	0.0003	0.0005	0.0002	0.0003	0.0003	0.0002
00:19:00	0.0007	0.2015	0.1708	0.1407	0.0813	0.0305	0.116	0.0004	0.0005	0.0004	0.0004	0.0006	0.0002	0.0004	0.0003	0.0003
00:19:06	0.0008	0.2025	0.1774	0.1458	0.0846	0.0376	0.1174	0.0004	0.0005	0.0004	0.0004	0.0006	0.0002	0.0004	0.0003	0.0003
00:19:12	0.0008	0.2037	0.1827	0.1502	0.0949	0.0414	0.132	0.0004	0.0005	0.0004	0.0004	0.0006	0.0002	0.0004	0.0003	0.0003
00:19:18	0.0008	0.2047	0.1861	0.1541	0.1077	0.0438	0.1363	0.0004	0.0005	0.0005	0.0004	0.0007	0.0002	0.0004	0.0003	0.0003
00:19:24	0.0008	0.2198	0.1877	0.1602	0.1133	0.0457	0.1378	0.0004	0.0005	0.0005	0.0004	0.0007	0.0002	0.0004	0.0003	0.0003
00:19:30	0.0008	0.2221	0.1949	0.1659	0.1219	0.0587	0.1423	0.0005	0.0005	0.0005	0.0004	0.0007	0.0002	0.0004	0.0003	0.0004
00:19:36	0.0008	0.2221	0.2029	0.166	0.1283	0.061	0.1476	0.0005	0.0005	0.0005	0.0004	0.0007	0.0002	0.0004	0.0003	0.0004
00:19:42	0.0008	0.2225	0.2059	0.1738	0.1316	0.0641	0.1501	0.0005	0.0006	0.0005	0.0004	0.0007	0.0003	0.0005	0.0003	0.0004
00:19:48	0.0009	0.2263	0.2173	0.1784	0.1361	0.0684	0.1509	0.0006	0.0006	0.0005	0.0005	0.0007	0.0003	0.0005	0.0003	0.0004
00:19:54	0.0009	0.2266	0.2203	0.1815	0.142	0.0748	0.1585	0.0006	0.0006	0.0006	0.0005	0.0008	0.0003	0.0005	0.0003	0.0004
00:20:00	0.0009	0.2381	0.2219	0.1869	0.1468	0.0832	0.1644	0.0006	0.0006	0.0006	0.0005	0.0008	0.0003	0.0005	0.0003	0.0004
00:20:06	0.0009	0.2391	0.2275	0.1906	0.1525	0.0838	0.1673	0.0006	0.0006	0.0006	0.0005	0.0008	0.0003	0.0006	0.0003	0.0005
00:20:12	0.0009	0.2423	0.2296	0.1931	0.1651	0.0897	0.1702	0.0006	0.0006	0.0006	0.0005	0.0008	0.0004	0.0006	0.0004	0.0005
00:20:18	0.0009	0.2439	0.2316	0.1963	0.1688	0.1103	0.1752	0.0006	0.0006	0.0006	0.0005	0.0008	0.0004	0.0006	0.0004	0.0005
00:20:24	0.0009	0.2454	0.2471	0.1984	0.171	0.1217	0.1825	0.0006	0.0006	0.0006	0.0006	0.0009	0.0004	0.0006	0.0004	0.0005
00:20:30	0.001	0.2465	0.2472	0.2033	0.1781	0.1229	0.1932	0.0006	0.0007	0.0007	0.0006	0.001	0.0004	0.0006	0.0004	0.0005
00:20:36	0.001	0.2472	0.2499	0.214	0.1816	0.1251	0.195	0.0006	0.0007	0.0007	0.0006	0.0011	0.0005	0.0006	0.0004	0.0006
00:20:42	0.001	0.2475	0.2529	0.2155	0.183	0.1329	0.2062	0.0006	0.0007	0.0007	0.0006	0.0011	0.0005	0.0006	0.0004	0.0006
00:20:48	0.001	0.2511	0.2543	0.2205	0.1871	0.1373	0.2071	0.0007	0.0007	0.0007	0.0007	0.0011	0.0005	0.0006	0.0004	0.0006
00:20:54	0.0011	0.2573	0.2564	0.2292	0.1909	0.1451	0.2104	0.0007	0.0007	0.0007	0.0007	0.0011	0.0005	0.0007	0.0004	0.0006
00:21:00	0.0011	0.2723	0.2582	0.2352	0.1995	0.1489	0.2166	0.0007	0.0007	0.0007	0.0007	0.0011	0.0005	0.0007	0.0004	0.0006
00:21:06	0.0011	0.273	0.2605	0.2358	0.2056	0.1511	0.2197	0.0007	0.0007	0.0007	0.0007	0.0012	0.0005	0.0007	0.0004	0.0006
00:21:12	0.0011	0.2735	0.2685	0.2359	0.2086	0.1517	0.2254	0.0007	0.0007	0.0007	0.0007	0.0012	0.0005	0.0007	0.0004	0.0006
00:21:18	0.0011	0.2739	0.2767	0.2383	0.2106	0.1584	0.2361	0.0008	0.0007	0.0008	0.0007	0.0012	0.0005	0.0007	0.0005	0.0006
00:21:24	0.0011	0.2847	0.2775	0.2394	0.211	0.169	0.2381	0.0008	0.0007	0.0008	0.0007	0.0012	0.0005	0.0007	0.0005	0.0007
00:21:30	0.0011	0.2877	0.2799	0.2509	0.213	0.1801	0.2383	0.0008	0.0008	0.0008	0.0007	0.0012	0.0005	0.0007	0.0005	0.0007
00:21:36	0.0011	0.2891	0.2827	0.2509	0.2232	0.1847	0.2442	0.0008	0.0008	0.0008	0.0007	0.0013	0.0005	0.0007	0.0005	0.0007
00:21:42	0.0012	0.2948	0.2827	0.253	0.2331	0.1879	0.2484	0.0009	0.0008	0.0009	0.0008	0.0013	0.0006	0.0007	0.0005	0.0008
00:21:48	0.0012	0.2958	0.289	0.2591	0.239	0.1928	0.2541	0.0009	0.0008	0.0009	0.0008	0.0014	0.0006	0.0007	0.0005	0.0008
00:21:54	0.0012	0.2983	0.2921	0.2634	0.2493	0.1964	0.2594	0.0009	0.0008	0.0009	0.0008	0.0014	0.0006	0.0008	0.0006	0.0008
00:22:00	0.0012	0.2994	0.2936	0.2688	0.2506	0.2015	0.2604	0.0009	0.0008	0.0009	0.0008	0.0015	0.0006	0.0008	0.0006	0.0008
00:22:06	0.0012	0.3002	0.2952	0.2724	0.2514	0.2037	0.2624	0.001	0.0008	0.0009	0.0008	0.0015	0.0006	0.0008	0.0006	0.0008
00:22:12	0.0013	0.3025	0.2986	0.279	0.2552	0.2087	0.2643	0.001	0.0009	0.0009	0.0009	0.0015	0.0006	0.0008	0.0006	0.0008
00:22:18	0.0013	0.305	0.3013	0.2818	0.2582	0.2119	0.2647	0.001	0.0009	0.0009	0.0009	0.0016	0.0006	0.0009	0.0006	0.0008
00:22:24	0.0013	0.3065	0.3031	0.2873	0.2633	0.2178	0.2782	0.001	0.0009	0.0009	0.0009	0.0016	0.0006	0.0009	0.0006	0.0008
00:22:30	0.0013	0.3076	0.3041	0.2903	0.2695	0.2311	0.2797	0.001	0.0009	0.0009	0.0009	0.0017	0.0006	0.0009	0.0006	0.0008
00:22:36	0.0013	0.3082	0.3071	0.2946	0.2736	0.2362	0.285	0.001	0.0009	0.0009	0.0009	0.0017	0.0006	0.0009	0.0006	0.0008
00:22:42	0.0013	0.3126	0.3099	0.2979	0.2768	0.2392	0.287	0.001	0.0009	0.0009	0.0009	0.0017	0.0006	0.0009	0.0006	0.0008
00:22:48	0.0013	0.3155	0.3174	0.3028	0.2854	0.2466	0.2913	0.001	0.0009	0.0009	0.001	0.0017	0.0006	0.0009	0.0006	0.0008
00:22:54	0.0014	0.3165	0.3182	0.3072	0.2888	0.2489	0.2923	0.0011	0.001	0.001	0.001	0.0017	0.0007	0.0009	0.0007	0.0009
00:23:00	0.0014	0.3205	0.3184	0.3089	0.2915	0.2506	0.2962	0.0011	0.001	0.001	0.001	0.0017	0.0007	0.0009	0.0007	0.0009
00:23:06	0.0014	0.3232	0.3184	0.3111	0.2955	0.255	0.3026	0.0011	0.001	0.001	0.001	0.0017	0.0007	0.001	0.0007	0.0009
00:23:12	0.0014	0.3234	0.3184	0.3123	0.2996	0.258	0.3055	0.0011	0.001	0.0011	0.001	0.0017	0.0007	0.001	0.0007	0.0009
00:23:18	0.0014	0.3234	0.3233	0.3128	0.3043	0.2587	0.3057	0.0011	0.0011	0.0011	0.001	0.0018	0.0007	0.001	0.0007	0.0009
00:23:24	0.0014	0.324	0.3263	0.3172	0.308	0.2614	0.309	0.0011	0.0011	0.0011	0.001	0.0018	0.0007	0.001	0.0007	0.0009
00:23:30	0.0014	0.3245	0.3289	0.3183	0.3088	0.2674	0.3097	0.0012	0.0011	0.0011	0.0011	0.0018	0.0007	0.001	0.0008	0.0009
00:23:36	0.0015	0.3255	0.3352	0.3195	0.3119	0.2705	0.3119	0.0012	0.0011	0.0012	0.0011	0.0019	0.0007	0.001	0.0008	0.0009
00:23:42	0.0015	0.3284	0.3392	0.3214	0.3126	0.2805	0.3125	0.0012	0.0011	0.0012	0.0011	0.0019	0.0007	0.001	0.0008	0.001
00:23:48	0.0015	0.3307	0.3394	0.323	0.3156	0.2827	0.3139	0.0012	0.0011	0.0013	0.0012	0.002	0.0007	0.001	0.0008	0.001
00:23:54	0.0015	0.334	0.3395	0.3239	0.3232	0.2833	0.3233	0.0013	0.0011	0.0013	0.0012	0.002	0.0008	0.001	0.0008	0.001
00:24:00	0.0015	0.3364	0.3404	0.3248	0.3234	0.2891	0.326	0.0013	0.0012	0.0013	0.0012	0.0021	0.0008	0.001	0.0008	0.001
00:24:06	0.0016	0.3374	0.3418	0.3272	0.3247	0.2954	0.3269	0.0013	0.0012	0.0013	0.0012	0.0021	0.0008	0.0011	0.0008	0.001
00:24:12	0.0016	0.3405	0.3423	0.3273	0.3297	0.2975	0.3323	0.0013	0.0012	0.0013	0.0012	0.0021	0.0008	0.0011	0.0008	0.001
00:24:18	0.0016	0.3426	0.3429	0.3286	0.3311	0.3093	0.3362	0.0013	0.0012	0.0013	0.0012	0.0022	0.0008	0.0011	0.0008	0.001
00:24:24	0.0016	0.3432	0.3442	0.335	0.3321	0.3129	0.3421	0.0013	0.0012	0.0013	0.0012	0.0022	0.0008	0.0011	0.0008	0.001
00:24:30	0.0016	0.3469	0.3444	0.3376	0.3327	0.3185	0.3422	0.0013	0.0012	0.0013	0.0013	0.0022	0.0008	0.0011	0.0009	0.0011
00:24:36	0.0016	0.3471	0.3453	0.3379	0.3371	0.319	0.3424	0.0014	0.0013	0.0013	0.0013	0.0023	0.0009	0.0011	0.0009	0.0011
00:24:42	0.0016	0.3497	0.3456	0.3414	0.3446	0.3208	0.3449	0.0014	0.0013	0.0014	0.0013	0.0023	0.0009	0.0011	0.0009	0.0011
00:24:48	0.0016	0.35	0.3504	0.3415	0.3474	0.3213	0.3468	0.0014	0.0013	0.0014	0.0013	0.0023	0.0009	0.0011	0.0009	0.0011
00:24:54	0.0016	0.3508	0.3568	0.3425	0.3475	0.322	0.3486	0.0015	0.0013	0.0014	0.0013	0.0024	0.0009	0.0012	0.0009	0.0011
00:25:00	0.0016	0.3512	0.3585	0.3435	0.3498	0.3234	0.3495	0.0015	0.0013	0.0014	0.0013	0.0024	0.0009	0.0012	0.0009	0.0012
00:25:06	0.0016	0.3535	0.3604	0.3457	0.3508	0.3276	0.3509	0.0015	0.0013	0.0014	0.0013	0.0024	0.0009	0.0012	0.0009	0.0012
00:25:12	0.0017	0.354	0.3625	0.3474	0.3511	0.3304	0.3511	0.0015	0.0014	0.0015	0.0013	0.0025	0.0009	0.0012	0.001	0.0012
00:25:18	0.0017	0.3552	0.3666	0.348	0.3521	0.3341	0.354	0.0016	0.0014	0.0015	0.0013	0.0025	0.0009	0.0012	0.001	0.0012
00:25:24	0.0017	0.3555	0.367	0.3483	0.3549	0.3358	0.3575	0.0016	0.0014	0.0015	0.0014	0.0025	0.001	0.0012	0.001	0.0012
00:25:30	0.0017	0.3555	0.3682	0.3493	0.3568	0.3359	0.3581	0.0016	0.0015	0.0015	0.0014	0.0025	0.001	0.0013	0.001	0.0012
00:25:36	0.0017	0.3578	0.3701	0.3528	0.3609	0.3394	0.3606	0.0016	0.0015	0.0016	0.0014	0.0025	0.001	0.0013	0.001	0.0012
00:25:42	0.0018	0.3591	0.3714	0.3533	0.3654	0.3445	0.363	0.0016	0.0015	0.0016	0.0014	0.0025	0.001	0.0013	0.001	0.0012
00:25:48	0.0018	0.3606	0.3721	0.3573	0.3656	0.3467	0.3635	0.0016	0.0015	0.0016	0.0014	0.0026	0.001	0.0013	0.001	0.0012
00:25:54	0.0018	0.3641	0.3723	0.3587	0.3688	0.3481	0.3681	0.0016	0.0016	0.0016	0.0014	0.0026	0.001	0.0013	0.0011	0.0012
00:26:00	0.0018	0.3646	0.3736	0.3596	0.3702	0.3488	0.3682	0.0017	0.0016	0.0017	0.0014	0.0026	0.001	0.0013	0.0011	0.0012
00:26:06	0.0018	0.3647	0.3749	0.3604	0.3712	0.3511	0.369	0.0017	0.0016	0.0017	0.0014	0.0026	0.001	0.0013	0.0011	0.0012
00:26:12	0.0019	0.3686	0.3751	0.3614	0.3722	0.3539	0.3704	0.0017	0.0016	0.0017	0.0014	0.0026	0.001	0.0013	0.0011	0.0012
00:26:18	0.0019	0.3712	0.3751	0.3639	0.3742	0.3565	0.3726	0.0017	0.0016	0.0017	0.0014	0.0026	0.001	0.0013	0.0012	0.0013
00:26:24	0.0019	0.3731	0.3759	0.3649	0.3748	0.3571	0.3739	0.0017	0.0016	0.0017	0.0014	0.0027	0.0011	0.0013	0.0012	0.0013
00:26:30	0.0019	0.3737	0.3776	0.3654	0.3766	0.3573	0.3759	0.0017	0.0017	0.0018	0.0014	0.0027	0.0011	0.0014	0.0012	0.0013
00:26:36	0.0019	0.3753	0.3821	0.3654	0.3837	0.3589	0.3803	0.0017	0.0017	0.0018	0.0014	0.0027	0.0011	0.0014	0.0012	0.0013
00:26:42	0.0019	0.376	0.3834	0.3665	0.3844	0.3631	0.3809	0.0018	0.0017	0.0018	0.0015	0.0027	0.0011	0.0014	0.0012	0.0013
00:26:48	0.0019	0.3765	0.3845	0.3666	0.3853	0.3673	0.3809	0.0018	0.0017	0.0018	0.0015	0.0027	0.0011	0.0014	0.0012	0.0014
00:26:54	0.0019	0.3766	0.3876	0.3686	0.386	0.3694	0.3823	0.0018	0.0017	0.0018	0.0015	0.0028	0.0011	0.0014	0.0012	0.0014
00:27:00	0.0019	0.3777	0.3887	0.3687	0.3869	0.3702	0.3843	0.0018	0.0017	0.0018	0.0015	0.0028	0.0011	0.0015	0.0012	0.0014
00:27:06	0.0019	0.3791	0.3908	0.3696	0.3909	0.3742	0.3865	0.0019	0.0017	0.0019	0.0015	0.0029	0.0011	0.0015	0.0012	0.0014
00:27:12	0.0019	0.3798	0.3912	0.3697	0.3924	0.3745	0.3874	0.0019	0.0017	0.0019	0.0015	0.0029	0.0011	0.0015	0.0012	0.0014
00:27:18	0.0019	0.3825	0.3929	0.3729	0.3928	0.378	0.389	0.0019	0.0018	0.0019	0.0015	0.0029	0.0011	0.0015	0.0012	0.0015
00:27:24	0.0019	0.3829	0.3943	0.373	0.3965	0.3801	0.3905	0.0019	0.0018	0.0019	0.0015	0.003	0.0011	0.0015	0.0012	0.0015
00:27:30	0.002	0.3829	0.3948	0.3744	0.397	0.3813	0.3921	0.0019	0.0018	0.0019	0.0015	0.003	0.0011	0.0015	0.0013	0.0015
00:27:36	0.002	0.3829	0.3951	0.3759	0.3973	0.3814	0.3927	0.0019	0.0019	0.0019	0.0015	0.003	0.0011	0.0015	0.0013	0.0015
00:27:42	0.002	0.383	0.3952	0.3765	0.3975	0.3821	0.3945	0.0019	0.0019	0.0019	0.0015	0.003	0.0011	0.0016	0.0013	0.0015
00:27:48	0.002	0.3852	0.3974	0.3787	0.3995	0.3833	0.3965	0.002	0.0019	0.002	0.0016	0.003	0.0012	0.0017	0.0013	0.0015
00:27:54	0.0021	0.3879	0.3976	0.3791	0.4012	0.386	0.3972	0.002	0.0019	0.002	0.0016	0.003	0.0012	0.0017	0.0013	0.0015
00:28:00	0.0021	0.3892	0.3994	0.3792	0.4016	0.3877	0.3989	0.002	0.002	0.0021	0.0016	0.003	0.0012	0.0017	0.0013	0.0015
00:28:06	0.0021	0.3907	0.4014	0.3799	0.4026	0.3881	0.3994	0.002	0.002	0.0021	0.0016	0.003	0.0012	0.0017	0.0013	0.0016
00:28:12	0.0021	0.3911	0.4024	0.3801	0.4055	0.3911	0.405	0.002	0.002	0.0021	0.0016	0.0031	0.0012	0.0018	0.0013	0.0016
00:28:18	0.0021	0.3912	0.4026	0.3807	0.4056	0.3946	0.4051	0.002	0.002	0.0021	0.0016	0.0031	0.0012	0.0018	0.0013	0.0016
00:28:24	0.0022	0.3918	0.4028	0.3828	0.4062	0.395	0.4052	0.0021	0.002	0.0021	0.0016	0.0031	0.0012	0.0018	0.0014	0.0016
00:28:30	0.0022	0.3918	0.4039	0.3852	0.4064	0.3992	0.4082	0.0021	0.002	0.0021	0.0016	0.0031	0.0012	0.0018	0.0014	0.0016
00:28:36	0.0022	0.3937	0.4055	0.3855	0.407	0.3992	0.4095	0.0021	0.002	0.0022	0.0016	0.0031	0.0012	0.0018	0.0014	0.0016
00:28:42	0.0022	0.3957	0.4056	0.3858	0.4071	0.4006	0.4104	0.0021	0.002	0.0023	0.0017	0.0032	0.0013	0.0019	0.0014	0.0016
00:28:48	0.0022	0.396	0.406	0.3861	0.4112	0.4016	0.4113	0.0021	0.002	0.0023	0.0017	0.0032	0.0013	0.0019	0.0014	0.0016
00:28:54	0.0022	0.3975	0.4098	0.3861	0.4128	0.4019	0.4114	0.0022	0.002	0.0023	0.0017	0.0032	0.0013	0.0019	0.0014	0.0016
00:29:00	0.0022	0.3989	0.4118	0.3872	0.4142	0.4031	0.4121	0.0022	0.002	0.0023	0.0018	0.0032	0.0013	0.002	0.0014	0.0016
00:29:06	0.0022	0.3998	0.4123	0.3875	0.4149	0.4034	0.4131	0.0022	0.002	0.0023	0.0018	0.0033	0.0013	0.002	0.0014	0.0017
00:29:12	0.0022	0.4012	0.4142	0.3878	0.4149	0.4037	0.4136	0.0022	0.002	0.0024	0.0018	0.0033	0.0013	0.002	0.0014	0.0017
00:29:18	0.0023	0.4014	0.4149	0.3883	0.4168	0.4056	0.414	0.0022	0.0021	0.0024	0.0018	0.0033	0.0013	0.002	0.0014	0.0017
00:29:24	0.0023	0.4024	0.416	0.3889	0.4217	0.4073	0.4151	0.0022	0.0021	0.0024	0.0018	0.0033	0.0013	0.002	0.0014	0.0017
00:29:30	0.0023	0.4024	0.416	0.391	0.4219	0.4076	0.4162	0.0023	0.0021	0.0024	0.0018	0.0033	0.0013	0.002	0.0014	0.0017
00:29:36	0.0023	0.4028	0.4169	0.3913	0.4219	0.4092	0.4224	0.0023	0.0021	0.0024	0.0018	0.0033	0.0013	0.002	0.0015	0.0017
00:29:42	0.0023	0.4029	0.4175	0.3918	0.4236	0.4145	0.423	0.0023	0.0021	0.0024	0.0018	0.0033	0.0014	0.0021	0.0015	0.0017
00:29:48	0.0023	0.4052	0.4177	0.3943	0.4246	0.4164	0.4234	0.0023	0.0021	0.0024	0.0018	0.0034	0.0014	0.0021	0.0015	0.0018
00:29:54	0.0023	0.4061	0.4195	0.3943	0.4248	0.4171	0.4235	0.0023	0.0021	0.0024	0.0019	0.0034	0.0014	0.0021	0.0015	0.0018
00:30:00	0.0023	0.4071	0.4205	0.3946	0.4275	0.4182	0.4243	0.0023	0.0021	0.0024	0.0019	0.0034	0.0014	0.0021	0.0015	0.0018
00:30:06	0.0023	0.4078	0.4208	0.3952	0.4276	0.4185	0.4249	0.0023	0.0021	0.0025	0.0019	0.0034	0.0014	0.0021	0.0015	0.0018
00:30:12	0.0024	0.4083	0.4231	0.3953	0.4284	0.4211	0.4268	0.0024	0.0022	0.0025	0.0019	0.0034	0.0014	0.0021	0.0015	0.0018
00:30:18	0.0024	0.4083	0.4239	0.3968	0.4291	0.424	0.4297	0.0024	0.0022	0.0025	0.002	0.0035	0.0014	0.0021	0.0015	0.0018
00:30:24	0.0024	0.4087	0.4245	0.3973	0.4316	0.424	0.4302	0.0024	0.0022	0.0025	0.002	0.0036	0.0014	0.0021	0.0015	0.0018
00:30:30	0.0024	0.4088	0.4247	0.3988	0.4328	0.425	0.4304	0.0024	0.0022	0.0026	0.002	0.0036	0.0015	0.0022	0.0016	0.0018
00:30:36	0.0025	0.4112	0.425	0.3989	0.4352	0.4251	0.4307	0.0024	0.0023	0.0026	0.002	0.0036	0.0015	0.0022	0.0016	0.0019
00:30:42	0.0025	0.4133	0.426	0.4001	0.4361	0.4254	0.4312	0.0025	0.0024	0.0026	0.002	0.0036	0.0015	0.0022	0.0016	0.0019
00:30:48	0.0025	0.4135	0.426	0.4004	0.4363	0.4257	0.4328	0.0025	0.0024	0.0026	0.002	0.0037	0.0015	0.0022	0.0016	0.0019
00:30:54	0.0025	0.4135	0.4273	0.401	0.4382	0.4279	0.4344	0.0026	0.0024	0.0027	0.002	0.0037	0.0015	0.0022	0.0016	0.0019
00:31:00	0.0025	0.4143	0.4277	0.4012	0.4384	0.4301	0.4349	0.0026	0.0024	0.0027	0.002	0.0037	0.0015	0.0022	0.0016	0.0019
00:31:06	0.0025	0.4144	0.4284	0.4019	0.4391	0.4322	0.4371	0.0026	0.0024	0.0027	0.002	0.0037	0.0015	0.0022	0.0016	0.0019
00:31:12	0.0026	0.415	0.4302	0.4028	0.44	0.4346	0.4375	0.0026	0.0024	0.0028	0.002	0.0037	0.0015	0.0023	0.0016	0.0019
00:31:18	0.0026	0.4151	0.431	0.4032	0.4411	0.4348	0.4396	0.0026	0.0024	0.0028	0.002	0.0038	0.0016	0.0023	0.0016	0.0019
00:31:24	0.0026	0.4156	0.4316	0.4039	0.4422	0.4355	0.4397	0.0026	0.0025	0.0029	0.0021	0.0038	0.0016	0.0023	0.0016	0.0019
00:31:30	0.0026	0.4168	0.4332	0.404	0.4434	0.4378	0.4404	0.0026	0.0025	0.0029	0.0021	0.0038	0.0016	0.0023	0.0016	0.002
00:31:36	0.0026	0.4171	0.4332	0.4052	0.4451	0.439	0.4405	0.0026	0.0026	0.0029	0.0021	0.0038	0.0016	0.0023	0.0017	0.002
00:31:42	0.0027	0.4176	0.4338	0.4058	0.4455	0.4393	0.4421	0.0026	0.0026	0.0029	0.0021	0.0038	0.0016	0.0023	0.0017	0.002
00:31:48	0.0027	0.4183	0.434	0.4062	0.4462	0.4394	0.4431	0.0026	0.0026	0.0029	0.0021	0.004	0.0016	0.0023	0.0017	0.002
00:31:54	0.0027	0.4186	0.4343	0.4063	0.448	0.4395	0.4445	0.0026	0.0026	0.003	0.0021	0.004	0.0016	0.0023	0.0017	0.002
00:32:00	0.0027	0.4189	0.4343	0.4087	0.4481	0.4412	0.4448	0.0026	0.0026	0.003	0.0021	0.004	0.0017	0.0023	0.0017	0.002
00:32:06	0.0027	0.4194	0.4344	0.4087	0.4485	0.4427	0.4448	0.0026	0.0027	0.003	0.0021	0.004	0.0017	0.0023	0.0017	0.002
00:32:12	0.0027	0.4199	0.435	0.4093	0.4487	0.4435	0.4462	0.0027	0.0027	0.003	0.0022	0.004	0.0017	0.0023	0.0017	0.002
00:32:18	0.0027	0.4215	0.4351	0.4098	0.4513	0.4444	0.4471	0.0027	0.0027	0.003	0.0022	0.0041	0.0017	0.0023	0.0017	0.002
00:32:24	0.0028	0.4219	0.436	0.4098	0.4518	0.4445	0.4473	0.0027	0.0027	0.0031	0.0023	0.0041	0.0017	0.0023	0.0017	0.002
00:32:30	0.0028	0.4221	0.436	0.4109	0.4538	0.4458	0.4483	0.0027	0.0027	0.0031	0.0023	0.0041	0.0017	0.0023	0.0018	0.002
00:32:36	0.0028	0.4231	0.4362	0.4117	0.4542	0.446	0.4502	0.0027	0.0027	0.0031	0.0023	0.0041	0.0018	0.0023	0.0018	0.002
00:32:42	0.0028	0.4242	0.4372	0.4123	0.4548	0.4461	0.4509	0.0028	0.0028	0.0031	0.0023	0.0042	0.0018	0.0024	0.0018	0.0021
00:32:48	0.0028	0.4249	0.4379	0.4124	0.4554	0.4464	0.451	0.0028	0.0028	0.0031	0.0023	0.0042	0.0018	0.0024	0.0018	0.0021
00:32:54	0.0028	0.425	0.4385	0.413	0.4558	0.4464	0.4511	0.0028	0.0028	0.0032	0.0023	0.0042	0.0018	0.0024	0.0018	0.0021
00:33:00	0.0029	0.4251	0.4395	0.4142	0.4572	0.4512	0.4515	0.0028	0.0028	0.0032	0.0023	0.0042	0.0019	0.0025	0.0018	0.0021
00:33:06	0.0029	0.4254	0.4415	0.4151	0.458	0.4517	0.452	0.0028	0.0028	0.0032	0.0023	0.0043	0.0019	0.0025	0.0018	0.0021
00:33:12	0.0029	0.4255	0.4416	0.4154	0.4584	0.4518	0.4524	0.0029	0.0029	0.0033	0.0024	0.0043	0.0019	0.0025	0.0018	0.0021
00:33:18	0.0029	0.4256	0.4417	0.4158	0.4591	0.4524	0.4525	0.0029	0.0029	0.0034	0.0024	0.0043	0.0019	0.0025	0.0018	0.0021
00:33:24	0.0029	0.4264	0.4417	0.4163	0.4599	0.4529	0.4531	0.0029	0.0029	0.0034	0.0024	0.0044	0.0019	0.0025	0.0018	0.0021
00:33:30	0.003	0.4271	0.4425	0.4164	0.46	0.453	0.4538	0.0029	0.0029	0.0034	0.0024	0.0044	0.0019	0.0025	0.0019	0.0021
00:33:36	0.003	0.4276	0.4425	0.4169	0.4609	0.455	0.4543	0.0029	0.0029	0.0034	0.0024	0.0044	0.0019	0.0026	0.0019	0.0021
00:33:42	0.003	0.4277	0.4428	0.4186	0.4623	0.4552	0.4555	0.0029	0.0029	0.0034	0.0025	0.0044	0.002	0.0026	0.0019	0.0021
00:33:48	0.003	0.4281	0.4429	0.4193	0.4626	0.4561	0.4556	0.003	0.0029	0.0034	0.0025	0.0045	0.002	0.0026	0.0019	0.0021
00:33:54	0.003	0.4285	0.4451	0.4197	0.4631	0.4565	0.4561	0.003	0.003	0.0034	0.0025	0.0045	0.002	0.0026	0.0019	0.0022
00:34:00	0.0031	0.4285	0.4453	0.4197	0.4643	0.4586	0.4577	0.003	0.003	0.0034	0.0025	0.0045	0.002	0.0026	0.0019	0.0022
00:34:06	0.0031	0.4288	0.4454	0.4203	0.4649	0.4594	0.4577	0.003	0.003	0.0035	0.0025	0.0045	0.002	0.0027	0.0019	0.0022
00:34:12	0.0031	0.4299	0.4458	0.4209	0.4653	0.4595	0.4579	0.003	0.003	0.0035	0.0026	0.0045	0.002	0.0027	0.002	0.0022
00:34:18	0.0032	0.4301	0.4463	0.4209	0.4656	0.4612	0.4579	0.003	0.0031	0.0035	0.0026	0.0045	0.002	0.0027	0.002	0.0022
00:34:24	0.0032	0.4301	0.4468	0.4222	0.4657	0.4616	0.4583	0.0031	0.0031	0.0036	0.0026	0.0045	0.002	0.0027	0.002	0.0022
00:34:30	0.0032	0.4306	0.4488	0.4223	0.4658	0.4617	0.4587	0.0031	0.0031	0.0036	0.0026	0.0045	0.002	0.0028	0.002	0.0022
00:34:36	0.0032	0.4316	0.4488	0.4225	0.4665	0.4624	0.4608	0.0031	0.0031	0.0036	0.0026	0.0045	0.002	0.0028	0.002	0.0022
00:34:42	0.0033	0.4319	0.4493	0.4232	0.4668	0.463	0.4615	0.0031	0.0031	0.0036	0.0027	0.0045	0.002	0.0028	0.002	0.0022
00:34:48	0.0033	0.4325	0.4498	0.4242	0.4676	0.4631	0.462	0.0031	0.0031	0.0036	0.0027	0.0046	0.002	0.0029	0.002	0.0023
00:34:54	0.0033	0.4326	0.45	0.4247	0.4681	0.4639	0.4628	0.0031	0.0031	0.0037	0.0027	0.0046	0.0021	0.0029	0.002	0.0023
00:35:00	0.0034	0.4342	0.4509	0.4247	0.4692	0.4652	0.4628	0.0032	0.0032	0.0037	0.0027	0.0046	0.0021	0.0029	0.002	0.0023
00:35:06	0.0034	0.4344	0.4512	0.425	0.4692	0.4659	0.4628	0.0032	0.0032	0.0037	0.0027	0.0046	0.0021	0.0029	0.002	0.0023
00:35:12	0.0034	0.4346	0.4527	0.4258	0.4701	0.4679	0.4629	0.0032	0.0032	0.0037	0.0027	0.0046	0.0021	0.0029	0.0021	0.0023
00:35:18	0.0034	0.4349	0.4529	0.4269	0.4713	0.4688	0.4629	0.0032	0.0032	0.0037	0.0027	0.0047	0.0021	0.0029	0.0021	0.0023
00:35:24	0.0034	0.4351	0.4529	0.4272	0.4717	0.469	0.463	0.0033	0.0032	0.0037	0.0027	0.0047	0.0021	0.003	0.0021	0.0024
00:35:30	0.0034	0.4371	0.4533	0.4279	0.472	0.4692	0.4649	0.0033	0.0033	0.0037	0.0027	0.0048	0.0021	0.003	0.0021	0.0024
00:35:36	0.0034	0.4371	0.4535	0.4282	0.4743	0.4692	0.4655	0.0033	0.0033	0.0037	0.0027	0.0048	0.0021	0.003	0.0021	0.0024
00:35:42	0.0035	0.4371	0.454	0.4283	0.4746	0.4699	0.4658	0.0033	0.0033	0.0037	0.0027	0.0048	0.0021	0.003	0.0021	0.0024
00:35:48	0.0035	0.4385	0.4541	0.429	0.4749	0.4699	0.467	0.0034	0.0033	0.0037	0.0027	0.0049	0.0021	0.003	0.0021	0.0024
00:35:54	0.0035	0.4392	0.4551	0.4294	0.475	0.4702	0.4674	0.0034	0.0033	0.0037	0.0028	0.0049	0.0021	0.0031	0.0021	0.0024
00:36:00	0.0036	0.4392	0.4553	0.4297	0.4751	0.4702	0.4674	0.0034	0.0033	0.0037	0.0028	0.0049	0.0022	0.0031	0.0021	0.0024
00:36:06	0.0036	0.4392	0.4554	0.431	0.4757	0.4717	0.4681	0.0034	0.0033	0.0037	0.0028	0.0049	0.0022	0.0031	0.0022	0.0024
00:36:12	0.0036	0.4394	0.4559	0.4316	0.4758	0.4719	0.4682	0.0035	0.0034	0.0038	0.0028	0.005	0.0022	0.0031	0.0022	0.0024
00:36:18	0.0036	0.4395	0.4561	0.4322	0.4779	0.4723	0.4688	0.0035	0.0034	0.0038	0.0028	0.005	0.0022	0.0031	0.0022	0.0024
00:36:24	0.0036	0.4396	0.4566	0.4323	0.4782	0.4728	0.4697	0.0035	0.0034	0.0038	0.0029	0.005	0.0022	0.0031	0.0022	0.0025
00:36:30	0.0036	0.4396	0.4567	0.4327	0.4783	0.473	0.4705	0.0035	0.0034	0.0038	0.0029	0.0051	0.0022	0.0031	0.0022	0.0025
00:36:36	0.0036	0.4403	0.4567	0.4327	0.4784	0.4736	0.4709	0.0035	0.0034	0.0038	0.0029	0.0051	0.0022	0.0031	0.0022	0.0025
00:36:42	0.0037	0.4404	0.4568	0.4328	0.4789	0.474	0.4711	0.0036	0.0035	0.0038	0.0029	0.0051	0.0022	0.0032	0.0022	0.0026
00:36:48	0.0037	0.4404	0.4571	0.4329	0.4789	0.4753	0.4714	0.0036	0.0035	0.0039	0.0029	0.0052	0.0022	0.0032	0.0023	0.0026
00:36:54	0.0037	0.4405	0.4573	0.4332	0.4791	0.4757	0.4717	0.0036	0.0035	0.004	0.0029	0.0052	0.0022	0.0032	0.0023	0.0026
00:37:00	0.0037	0.4407	0.4582	0.4332	0.4792	0.4763	0.4726	0.0036	0.0035	0.004	0.0029	0.0052	0.0022	0.0032	0.0023	0.0026
00:37:06	0.0037	0.441	0.4585	0.4333	0.48	0.4765	0.4727	0.0037	0.0035	0.004	0.0029	0.0052	0.0022	0.0032	0.0023	0.0027
00:37:12	0.0038	0.4411	0.4587	0.4339	0.4802	0.477	0.4728	0.0037	0.0035	0.004	0.003	0.0053	0.0022	0.0032	0.0023	0.0027
00:37:18	0.0038	0.4412	0.4589	0.4351	0.4805	0.4772	0.4743	0.0037	0.0035	0.0041	0.003	0.0053	0.0022	0.0032	0.0023	0.0027
00:37:24	0.0038	0.4414	0.4591	0.4353	0.481	0.4776	0.4746	0.0037	0.0036	0.0041	0.003	0.0053	0.0023	0.0032	0.0024	0.0027
00:37:30	0.0038	0.4415	0.4596	0.4359	0.4812	0.4777	0.4747	0.0037	0.0036	0.0041	0.003	0.0053	0.0023	0.0032	0.0024	0.0027
00:37:36	0.0038	0.4416	0.4596	0.4363	0.4826	0.4782	0.4749	0.0037	0.0036	0.0041	0.003	0.0053	0.0023	0.0032	0.0025	0.0027
00:37:42	0.0038	0.4422	0.4604	0.4371	0.4827	0.479	0.4756	0.0037	0.0037	0.0041	0.003	0.0053	0.0023	0.0032	0.0025	0.0027
00:37:48	0.0038	0.4423	0.4604	0.4373	0.4841	0.4799	0.4761	0.0038	0.0037	0.0041	0.003	0.0053	0.0024	0.0032	0.0025	0.0027
00:37:54	0.0038	0.4423	0.4619	0.4375	0.4842	0.4809	0.4763	0.0038	0.0037	0.0042	0.003	0.0054	0.0024	0.0032	0.0025	0.0027
00:38:00	0.0038	0.4423	0.4619	0.4375	0.4843	0.4812	0.4766	0.0038	0.0037	0.0042	0.003	0.0054	0.0024	0.0032	0.0025	0.0027
00:38:06	0.0039	0.4423	0.4621	0.4375	0.4845	0.4813	0.4774	0.0038	0.0037	0.0042	0.003	0.0054	0.0024	0.0033	0.0025	0.0027
00:38:12	0.0039	0.4423	0.4621	0.4376	0.4846	0.4819	0.4781	0.0039	0.0037	0.0042	0.003	0.0054	0.0024	0.0033	0.0025	0.0027
00:38:18	0.0039	0.4423	0.4626	0.4376	0.4847	0.482	0.4787	0.0039	0.0037	0.0043	0.003	0.0054	0.0024	0.0033	0.0026	0.0027
00:38:24	0.0039	0.4423	0.4632	0.4377	0.485	0.4822	0.4793	0.0039	0.0038	0.0043	0.0031	0.0055	0.0024	0.0033	0.0026	0.0027
00:38:30	0.0039	0.4424	0.4635	0.4381	0.4862	0.4826	0.4794	0.0039	0.0038	0.0044	0.0031	0.0055	0.0024	0.0033	0.0026	0.0027
00:38:36	0.004	0.4424	0.4637	0.4382	0.4866	0.483	0.4797	0.0039	0.0038	0.0044	0.0031	0.0055	0.0024	0.0033	0.0026	0.0028
00:38:42	0.004	0.4424	0.4639	0.4386	0.4867	0.483	0.4804	0.0039	0.0038	0.0044	0.0031	0.0055	0.0024	0.0033	0.0026	0.0028
00:38:48	0.004	0.4426	0.4641	0.4387	0.4869	0.4832	0.4805	0.004	0.0038	0.0044	0.0031	0.0055	0.0024	0.0033	0.0026	0.0028
00:38:54	0.004	0.4426	0.4641	0.4387	0.4873	0.4834	0.4806	0.004	0.0038	0.0044	0.0031	0.0055	0.0025	0.0034	0.0026	0.0028
00:39:00	0.004	0.4392	0.4648	0.4387	0.4881	0.4843	0.4809	0.004	0.0038	0.0045	0.0031	0.0056	0.0025	0.0034	0.0027	0.0028
00:39:06	0.004	0.4392	0.4648	0.4388	0.4885	0.4854	0.4809	0.004	0.0039	0.0045	0.0032	0.0056	0.0025	0.0034	0.0027	0.0028
00:39:12	0.0041	0.4392	0.4651	0.439	0.4885	0.4857	0.4809	0.0041	0.0039	0.0045	0.0032	0.0057	0.0025	0.0034	0.0027	0.0029
00:39:18	0.0041	0.4387	0.4651	0.439	0.489	0.486	0.4812	0.0041	0.0039	0.0046	0.0032	0.0057	0.0025	0.0034	0.0027	0.0029
00:39:24	0.0042	0.4376	0.4653	0.439	0.4893	0.4861	0.4813	0.0041	0.0039	0.0046	0.0032	0.0057	0.0025	0.0034	0.0027	0.0029
00:39:30	0.0042	0.4374	0.4654	0.4393	0.4894	0.4865	0.4815	0.0041	0.0039	0.0046	0.0032	0.0058	0.0026	0.0035	0.0027	0.0029
00:39:36	0.0042	0.4373	0.4655	0.4393	0.4898	0.4865	0.4815	0.0041	0.0039	0.0046	0.0032	0.0058	0.0026	0.0035	0.0027	0.0029
00:39:42	0.0043	0.437	0.4658	0.4396	0.4899	0.4869	0.4818	0.0042	0.0039	0.0047	0.0032	0.0058	0.0026	0.0035	0.0027	0.0029
00:39:48	0.0044	0.4366	0.4658	0.4396	0.4909	0.4871	0.4819	0.0042	0.004	0.0047	0.0032	0.0058	0.0026	0.0035	0.0027	0.0029
00:39:54	0.0044	0.4359	0.4659	0.4397	0.492	0.488	0.4819	0.0042	0.004	0.0047	0.0032	0.0059	0.0026	0.0035	0.0028	0.0029
00:40:00	0.0044	0.435	0.4659	0.4399	0.4922	0.4881	0.4822	0.0042	0.004	0.0047	0.0032	0.0059	0.0026	0.0036	0.0028	0.0029
00:40:06	0.0045	0.4348	0.4657	0.4399	0.4921	0.4885	0.4822	0.0042	0.004	0.0048	0.0033	0.0059	0.0026	0.0036	0.0028	0.0029
00:40:12	0.0045	0.4337	0.4651	0.4391	0.4921	0.4886	0.4822	0.0042	0.004	0.0048	0.0033	0.006	0.0026	0.0036	0.0028	0.0029
00:40:18	0.0045	0.4334	0.4648	0.4391	0.4921	0.4892	0.4822	0.0043	0.004	0.0048	0.0033	0.0061	0.0026	0.0036	0.0028	0.0029
00:40:24	0.0045	0.4329	0.4647	0.4388	0.4921	0.4896	0.4822	0.0043	0.004	0.0049	0.0033	0.0061	0.0026	0.0036	0.0028	0.0029
00:40:30	0.0045	0.4307	0.4647	0.4386	0.4921	0.4902	0.4822	0.0043	0.0041	0.0049	0.0033	0.0061	0.0026	0.0036	0.0028	0.0029
00:40:36	0.0046	0.4305	0.4643	0.4385	0.4921	0.4909	0.4821	0.0043	0.0041	0.0049	0.0033	0.0061	0.0026	0.0037	0.0028	0.0029
00:40:42	0.0046	0.4301	0.4641	0.4383	0.4921	0.4909	0.4821	0.0043	0.0041	0.005	0.0033	0.0061	0.0026	0.0037	0.0028	0.0029
00:40:48	0.0047	0.4297	0.464	0.4381	0.4921	0.4921	0.4821	0.0043	0.0041	0.005	0.0033	0.0062	0.0026	0.0037	0.0028	0.0029
00:40:54	0.0047	0.4296	0.4626	0.4376	0.4921	0.4921	0.4821	0.0043	0.0041	0.005	0.0034	0.0063	0.0026	0.0037	0.0028	0.003
00:41:00	0.0047	0.4284	0.4622	0.4374	0.4921	0.4922	0.4821	0.0043	0.0042	0.005	0.0034	0.0063	0.0026	0.0037	0.0028	0.003
00:41:06	0.0048	0.4272	0.4618	0.4366	0.4921	0.4925	0.4814	0.0043	0.0042	0.005	0.0034	0.0063	0.0026	0.0037	0.0028	0.003
00:41:12	0.0048	0.4249	0.4618	0.4361	0.492	0.4927	0.481	0.0043	0.0042	0.005	0.0035	0.0063	0.0027	0.0037	0.0029	0.003
00:41:18	0.0048	0.424	0.4617	0.436	0.492	0.4928	0.4807	0.0044	0.0042	0.005	0.0035	0.0064	0.0027	0.0037	0.0029	0.003
00:41:24	0.0048	0.4231	0.4595	0.4357	0.492	0.4932	0.4806	0.0044	0.0042	0.0051	0.0035	0.0064	0.0027	0.0037	0.0029	0.003
00:41:30	0.0048	0.4202	0.4592	0.435	0.4915	0.4939	0.4806	0.0044	0.0042	0.0051	0.0035	0.0064	0.0027	0.0037	0.0029	0.003
00:41:36	0.0048	0.418	0.4592	0.4347	0.4914	0.494	0.4805	0.0044	0.0042	0.0051	0.0035	0.0064	0.0027	0.0038	0.0029	0.003
00:41:42	0.0048	0.4174	0.4587	0.4342	0.4913	0.4941	0.4805	0.0044	0.0042	0.0051	0.0035	0.0064	0.0027	0.0038	0.0029	0.003
00:41:48	0.0048	0.4171	0.4584	0.4317	0.4912	0.4943	0.4801	0.0045	0.0042	0.0051	0.0035	0.0064	0.0027	0.0038	0.0029	0.0031
00:41:54	0.0048	0.4158	0.4577	0.4315	0.4912	0.4946	0.48	0.0045	0.0043	0.0052	0.0035	0.0064	0.0027	0.0038	0.0029	0.0031
00:42:00	0.0049	0.4151	0.4576	0.4315	0.4907	0.4951	0.48	0.0045	0.0043	0.0052	0.0035	0.0065	0.0028	0.0038	0.0029	0.0031
00:42:06	0.0049	0.4133	0.4564	0.4308	0.4906	0.4951	0.48	0.0045	0.0043	0.0052	0.0035	0.0065	0.0028	0.0039	0.0029	0.0031
00:42:12	0.0049	0.4128	0.4556	0.4302	0.4897	0.4951	0.4787	0.0045	0.0043	0.0052	0.0036	0.0065	0.0028	0.0039	0.0029	0.0031
00:42:18	0.0049	0.4107	0.4552	0.4294	0.4893	0.495	0.4784	0.0045	0.0043	0.0052	0.0036	0.0065	0.0028	0.0039	0.003	0.0031
00:42:24	0.0049	0.4096	0.4518	0.4282	0.4893	0.495	0.4778	0.0045	0.0044	0.0053	0.0036	0.0065	0.0028	0.0039	0.003	0.0031
00:42:30	0.005	0.4084	0.4517	0.4275	0.4892	0.4949	0.4774	0.0046	0.0044	0.0053	0.0036	0.0065	0.0029	0.0039	0.003	0.0032
00:42:36	0.005	0.4052	0.4511	0.4267	0.489	0.4945	0.4769	0.0046	0.0044	0.0053	0.0036	0.0065	0.0029	0.0039	0.003	0.0032
00:42:42	0.005	0.4036	0.4508	0.4266	0.4886	0.4945	0.4768	0.0046	0.0045	0.0053	0.0037	0.0066	0.0029	0.0039	0.003	0.0032
00:42:48	0.005	0.4026	0.4501	0.4262	0.4881	0.4944	0.4758	0.0046	0.0045	0.0053	0.0037	0.0066	0.0029	0.0039	0.003	0.0032
00:42:54	0.005	0.4003	0.445	0.4256	0.4873	0.4941	0.4754	0.0046	0.0045	0.0054	0.0037	0.0066	0.0029	0.004	0.003	0.0032
00:43:00	0.0051	0.3983	0.4444	0.4237	0.486	0.4941	0.4746	0.0046	0.0045	0.0054	0.0037	0.0066	0.0029	0.004	0.003	0.0032
00:43:06	0.0051	0.3965	0.4444	0.4226	0.4858	0.494	0.474	0.0046	0.0045	0.0054	0.0037	0.0066	0.0029	0.004	0.003	0.0032
00:43:12	0.0051	0.3941	0.4425	0.4223	0.4855	0.4936	0.472	0.0046	0.0045	0.0055	0.0037	0.0067	0.0029	0.004	0.003	0.0032
00:43:18	0.0051	0.3926	0.4416	0.4183	0.485	0.4931	0.4719	0.0047	0.0046	0.0055	0.0038	0.0067	0.003	0.004	0.003	0.0033
00:43:24	0.0051	0.3868	0.4401	0.4179	0.4847	0.4923	0.4711	0.0047	0.0046	0.0055	0.0038	0.0067	0.003	0.004	0.003	0.0033
00:43:30	0.0052	0.3825	0.439	0.417	0.4837	0.492	0.4702	0.0047	0.0046	0.0055	0.0038	0.0067	0.003	0.004	0.003	0.0033
00:43:36	0.0052	0.3821	0.4344	0.4164	0.4835	0.492	0.469	0.0047	0.0046	0.0055	0.0038	0.0067	0.003	0.0041	0.003	0.0034
00:43:42	0.0052	0.3814	0.4323	0.4133	0.4826	0.4916	0.4681	0.0047	0.0047	0.0055	0.0038	0.0067	0.003	0.0041	0.0031	0.0034
00:43:48	0.0052	0.3803	0.4309	0.4108	0.4807	0.4915	0.467	0.0048	0.0047	0.0056	0.0038	0.0068	0.003	0.0041	0.0031	0.0034
00:43:54	0.0052	0.3786	0.4289	0.4087	0.4804	0.4913	0.467	0.0048	0.0047	0.0056	0.0038	0.0068	0.003	0.0041	0.0031	0.0034
00:44:00	0.0053	0.3769	0.4213	0.4079	0.4784	0.4912	0.4668	0.0048	0.0048	0.0056	0.0039	0.0068	0.003	0.0041	0.0031	0.0034
00:44:06	0.0053	0.3743	0.4209	0.4046	0.4774	0.4911	0.4664	0.0048	0.0048	0.0056	0.0039	0.0068	0.0031	0.0042	0.0031	0.0034
00:44:12	0.0053	0.373	0.419	0.4025	0.4747	0.4902	0.4658	0.0048	0.0048	0.0056	0.0039	0.0068	0.0031	0.0042	0.0031	0.0034
00:44:18	0.0053	0.373	0.4182	0.4015	0.4747	0.49	0.4653	0.0049	0.0048	0.0056	0.0039	0.0069	0.0031	0.0042	0.0031	0.0035
00:44:24	0.0053	0.3652	0.4162	0.3936	0.4714	0.4886	0.462	0.005	0.0048	0.0056	0.0039	0.0069	0.0031	0.0042	0.0031	0.0035
00:44:30	0.0053	0.3569	0.4151	0.392	0.4713	0.4885	0.4562	0.005	0.0048	0.0057	0.0039	0.0069	0.0031	0.0042	0.0031	0.0035
00:44:36	0.0054	0.3558	0.4133	0.3919	0.4709	0.4883	0.4552	0.005	0.0049	0.0057	0.004	0.0069	0.0031	0.0042	0.0031	0.0035
00:44:42	0.0054	0.3539	0.4107	0.3908	0.4696	0.4883	0.4545	0.005	0.005	0.0057	0.004	0.0069	0.0031	0.0042	0.0032	0.0035
00:44:48	0.0054	0.3522	0.404	0.3896	0.4691	0.4882	0.454	0.005	0.005	0.0057	0.004	0.0069	0.0031	0.0042	0.0032	0.0035
00:44:54	0.0054	0.3503	0.4023	0.3872	0.4669	0.4881	0.4521	0.005	0.005	0.0057	0.004	0.0069	0.0031	0.0042	0.0032	0.0035
00:45:00	0.0054	0.3491	0.3987	0.3864	0.4653	0.4872	0.4502	0.0051	0.005	0.0057	0.004	0.007	0.0032	0.0042	0.0032	0.0035
00:45:06	0.0055	0.3438	0.3945	0.3864	0.4586	0.4859	0.4488	0.0051	0.0051	0.0058	0.004	0.007	0.0032	0.0042	0.0032	0.0035
00:45:12	0.0055	0.3424	0.3941	0.3822	0.4558	0.483	0.4488	0.0051	0.0051	0.0058	0.004	0.007	0.0032	0.0043	0.0032	0.0036
00:45:18	0.0055	0.3386	0.3935	0.3763	0.4546	0.4814	0.4486	0.0051	0.0051	0.0058	0.0041	0.007	0.0032	0.0043	0.0032	0.0036
00:45:24	0.0055	0.3366	0.3926	0.3757	0.4543	0.4806	0.4465	0.0051	0.0052	0.0058	0.0041	0.007	0.0032	0.0044	0.0033	0.0036
00:45:30	0.0055	0.3345	0.3903	0.3721	0.454	0.4774	0.443	0.0051	0.0052	0.0058	0.0041	0.007	0.0032	0.0044	0.0033	0.0036
00:45:36	0.0055	0.3319	0.3847	0.3682	0.4513	0.477	0.4404	0.0052	0.0052	0.0058	0.0041	0.0071	0.0032	0.0044	0.0033	0.0036
00:45:42	0.0056	0.3319	0.383	0.3672	0.4501	0.4767	0.4398	0.0052	0.0053	0.0059	0.0041	0.0071	0.0032	0.0044	0.0033	0.0036
00:45:48	0.0056	0.3279	0.3783	0.3634	0.4492	0.4754	0.4332	0.0052	0.0053	0.0059	0.0041	0.0071	0.0032	0.0044	0.0034	0.0037
00:45:54	0.0056	0.3274	0.3763	0.3629	0.4488	0.4741	0.4324	0.0052	0.0053	0.0059	0.0041	0.0071	0.0032	0.0044	0.0034	0.0037
00:46:00	0.0056	0.3257	0.3716	0.3615	0.4479	0.4738	0.4296	0.0052	0.0053	0.0059	0.0041	0.0072	0.0032	0.0044	0.0034	0.0037
00:46:06	0.0056	0.3232	0.3684	0.3612	0.4476	0.4732	0.4284	0.0052	0.0053	0.0059	0.0042	0.0073	0.0033	0.0044	0.0035	0.0038
00:46:12	0.0056	0.3229	0.3664	0.3585	0.4433	0.4698	0.4284	0.0052	0.0053	0.0059	0.0042	0.0073	0.0033	0.0044	0.0035	0.0038
00:46:18	0.0056	0.3226	0.3644	0.3551	0.4417	0.4695	0.4272	0.0053	0.0054	0.0059	0.0042	0.0073	0.0033	0.0045	0.0035	0.0038
00:46:24	0.0056	0.3213	0.3576	0.3515	0.4411	0.4667	0.4201	0.0053	0.0054	0.0059	0.0042	0.0074	0.0033	0.0045	0.0035	0.0038
00:46:30	0.0056	0.32	0.3561	0.3468	0.4347	0.4646	0.4191	0.0053	0.0054	0.0059	0.0043	0.0074	0.0033	0.0045	0.0035	0.0038
00:46:36	0.0057	0.3155	0.3544	0.3461	0.4344	0.4621	0.4188	0.0053	0.0054	0.0059	0.0043	0.0074	0.0033	0.0045	0.0035	0.0038
00:46:42	0.0057	0.3115	0.3517	0.3404	0.4342	0.461	0.4103	0.0053	0.0054	0.0059	0.0043	0.0074	0.0034	0.0046	0.0035	0.0038
00:46:48	0.0057	0.3082	0.3468	0.3389	0.4329	0.4579	0.409	0.0053	0.0054	0.006	0.0043	0.0074	0.0034	0.0046	0.0035	0.0038
00:46:54	0.0057	0.3055	0.3466	0.3376	0.432	0.4543	0.4067	0.0054	0.0054	0.006	0.0044	0.0074	0.0034	0.0046	0.0035	0.0038
00:47:00	0.0058	0.3023	0.3432	0.3357	0.4267	0.4519	0.404	0.0054	0.0054	0.006	0.0044	0.0075	0.0034	0.0046	0.0036	0.0039
00:47:06	0.0058	0.2955	0.3398	0.333	0.4243	0.4428	0.4025	0.0054	0.0054	0.006	0.0044	0.0075	0.0034	0.0046	0.0036	0.0039
00:47:12	0.0058	0.2938	0.339	0.3318	0.4218	0.4423	0.4019	0.0054	0.0055	0.0061	0.0044	0.0075	0.0034	0.0047	0.0036	0.0039
00:47:18	0.0058	0.2937	0.3366	0.3238	0.4214	0.4422	0.3953	0.0055	0.0055	0.0061	0.0044	0.0076	0.0034	0.0047	0.0036	0.0039
00:47:24	0.0058	0.2906	0.3328	0.3198	0.4151	0.4389	0.3912	0.0055	0.0056	0.0061	0.0044	0.0076	0.0034	0.0047	0.0036	0.0039
00:47:30	0.0058	0.2859	0.3316	0.319	0.4125	0.4388	0.3843	0.0055	0.0056	0.0061	0.0044	0.0076	0.0034	0.0047	0.0036	0.0039
00:47:36	0.0058	0.2853	0.3286	0.319	0.4114	0.4379	0.3839	0.0055	0.0056	0.0061	0.0044	0.0076	0.0034	0.0047	0.0036	0.0039
00:47:42	0.0059	0.2849	0.3282	0.3187	0.4084	0.4349	0.3822	0.0055	0.0056	0.0061	0.0045	0.0077	0.0034	0.0047	0.0036	0.0039
00:47:48	0.0059	0.2841	0.3268	0.3169	0.4051	0.4337	0.3796	0.0055	0.0056	0.0062	0.0045	0.0077	0.0034	0.0047	0.0036	0.0039
00:47:54	0.0059	0.2839	0.3248	0.3162	0.4032	0.4321	0.3787	0.0055	0.0057	0.0062	0.0045	0.0077	0.0035	0.0047	0.0037	0.0039
00:48:00	0.0059	0.2806	0.3197	0.3096	0.4004	0.4292	0.3783	0.0055	0.0057	0.0062	0.0045	0.0078	0.0035	0.0048	0.0037	0.0039
00:48:06	0.0059	0.2713	0.3183	0.3095	0.3962	0.429	0.3761	0.0056	0.0057	0.0062	0.0045	0.0078	0.0035	0.0048	0.0037	0.0039
00:48:12	0.0059	0.2692	0.3179	0.3028	0.3952	0.4246	0.3754	0.0056	0.0058	0.0062	0.0045	0.0078	0.0035	0.0048	0.0037	0.0039
00:48:18	0.0059	0.2682	0.3165	0.3021	0.3905	0.4158	0.3729	0.0056	0.0058	0.0062	0.0045	0.0078	0.0035	0.0048	0.0037	0.0039
00:48:24	0.0059	0.268	0.3148	0.3001	0.3902	0.4154	0.3667	0.0056	0.0058	0.0062	0.0046	0.0078	0.0035	0.0049	0.0037	0.004
00:48:30	0.0059	0.2666	0.3068	0.2933	0.3887	0.4149	0.3576	0.0056	0.0058	0.0063	0.0046	0.0079	0.0035	0.0049	0.0037	0.004
00:48:36	0.0059	0.2632	0.305	0.2925	0.3867	0.4141	0.3565	0.0056	0.0058	0.0063	0.0046	0.0079	0.0035	0.0049	0.0037	0.004
00:48:42	0.0059	0.2629	0.3025	0.2915	0.3831	0.4137	0.3563	0.0056	0.0058	0.0063	0.0046	0.0079	0.0035	0.0049	0.0037	0.004
00:48:48	0.006	0.2608	0.3021	0.2906	0.3816	0.4113	0.3557	0.0056	0.0058	0.0063	0.0046	0.0079	0.0035	0.0049	0.0037	0.004
00:48:54	0.006	0.2607	0.3006	0.2881	0.377	0.4103	0.3539	0.0057	0.0058	0.0063	0.0046	0.008	0.0035	0.0049	0.0037	0.004
00:49:00	0.006	0.2597	0.3003	0.2875	0.3759	0.4006	0.3529	0.0057	0.0058	0.0064	0.0046	0.008	0.0035	0.0049	0.0038	0.004
00:49:06	0.006	0.2542	0.2973	0.287	0.3744	0.399	0.3511	0.0057	0.0058	0.0064	0.0047	0.008	0.0036	0.005	0.0038	0.004
00:49:12	0.006	0.2517	0.2929	0.2831	0.3743	0.3957	0.35	0.0057	0.0058	0.0064	0.0047	0.0081	0.0036	0.005	0.0038	0.004
00:49:18	0.006	0.2505	0.2895	0.2782	0.3671	0.3923	0.346	0.0057	0.0059	0.0064	0.0047	0.0082	0.0036	0.005	0.0038	0.004
00:49:24	0.006	0.2486	0.288	0.273	0.3635	0.3888	0.346	0.0057	0.0059	0.0064	0.0047	0.0082	0.0036	0.005	0.0038	0.004
00:49:30	0.0061	0.2478	0.2861	0.2727	0.3566	0.3852	0.343	0.0057	0.0059	0.0064	0.0047	0.0082	0.0036	0.005	0.0038	0.004
00:49:36	0.0061	0.246	0.2854	0.2721	0.355	0.383	0.3426	0.0057	0.0059	0.0064	0.0047	0.0082	0.0036	0.005	0.0039	0.0041
00:49:42	0.0062	0.2459	0.2827	0.2715	0.354	0.3772	0.3422	0.0057	0.0059	0.0064	0.0047	0.0083	0.0037	0.005	0.0039	0.0041
00:49:48	0.0063	0.2425	0.2803	0.2697	0.3539	0.377	0.3394	0.0058	0.0059	0.0064	0.0047	0.0083	0.0037	0.005	0.0039	0.0041
00:49:54	0.0063	0.2424	0.2798	0.2693	0.353	0.3764	0.3389	0.0058	0.0059	0.0065	0.0048	0.0083	0.0037	0.005	0.0039	0.0041
00:50:00	0.0063	0.2373	0.2782	0.2678	0.3517	0.3738	0.3301	0.0058	0.0059	0.0065	0.0048	0.0083	0.0037	0.0051	0.0039	0.0041
00:50:06	0.0063	0.2281	0.2763	0.2664	0.3474	0.3715	0.3283	0.0058	0.0059	0.0065	0.0048	0.0083	0.0037	0.0051	0.0039	0.0041
00:50:12	0.0064	0.224	0.2741	0.2646	0.3471	0.37	0.3252	0.0058	0.006	0.0065	0.0048	0.0084	0.0037	0.0051	0.004	0.0041
00:50:18	0.0064	0.223	0.2722	0.2638	0.3453	0.3691	0.3233	0.0058	0.006	0.0065	0.0048	0.0084	0.0037	0.0051	0.004	0.0041
00:50:24	0.0064	0.2228	0.2718	0.2631	0.3452	0.3657	0.3225	0.0058	0.006	0.0066	0.0048	0.0084	0.0037	0.0051	0.004	0.0041
00:50:30	0.0064	0.2219	0.2715	0.2604	0.3435	0.3633	0.3193	0.0058	0.006	0.0066	0.0048	0.0085	0.0037	0.0051	0.004	0.0041
00:50:36	0.0064	0.2217	0.2694	0.2552	0.3432	0.3627	0.3192	0.0059	0.0061	0.0066	0.0048	0.0085	0.0038	0.0051	0.004	0.0041
00:50:42	0.0064	0.2215	0.2671	0.2547	0.342	0.3623	0.3157	0.0059	0.0061	0.0066	0.0048	0.0085	0.0038	0.0052	0.004	0.0042
00:50:48	0.0064	0.219	0.2668	0.2543	0.3404	0.3581	0.3136	0.0059	0.0061	0.0066	0.0048	0.0085	0.0038	0.0052	0.004	0.0042
00:50:54	0.0064	0.2163	0.2621	0.2484	0.3337	0.3572	0.3109	0.0059	0.0061	0.0067	0.0049	0.0086	0.0038	0.0052	0.004	0.0042
00:51:00	0.0064	0.2156	0.2597	0.2477	0.3309	0.3505	0.3107	0.006	0.0061	0.0067	0.0049	0.0086	0.0038	0.0052	0.004	0.0042
00:51:06	0.0064	0.2135	0.2595	0.2474	0.3296	0.3457	0.3096	0.006	0.0062	0.0067	0.0049	0.0087	0.0038	0.0052	0.004	0.0042
00:51:12	0.0065	0.2086	0.2576	0.2459	0.3296	0.3448	0.3068	0.006	0.0062	0.0068	0.0049	0.0087	0.0038	0.0052	0.0041	0.0042
00:51:18	0.0065	0.2086	0.2573	0.2457	0.3267	0.3442	0.3058	0.0061	0.0062	0.0068	0.0049	0.0087	0.0038	0.0052	0.0041	0.0042
00:51:24	0.0065	0.2047	0.2571	0.2453	0.3232	0.3424	0.3047	0.0061	0.0062	0.0068	0.0049	0.0087	0.0039	0.0052	0.0041	0.0042
00:51:30	0.0065	0.2031	0.2551	0.2371	0.3222	0.3406	0.3029	0.0061	0.0062	0.0068	0.0049	0.0087	0.0039	0.0052	0.0041	0.0043
00:51:36	0.0065	0.2017	0.2498	0.2359	0.318	0.3357	0.3015	0.0062	0.0062	0.0068	0.0049	0.0087	0.0039	0.0052	0.0041	0.0043
00:51:42	0.0065	0.2012	0.2475	0.2317	0.3174	0.3355	0.3011	0.0062	0.0062	0.0068	0.0049	0.0087	0.0039	0.0052	0.0041	0.0043
00:51:48	0.0066	0.201	0.2464	0.2312	0.3145	0.3336	0.2993	0.0062	0.0062	0.0068	0.0049	0.0087	0.0039	0.0052	0.0041	0.0043
00:51:54	0.0066	0.1997	0.2415	0.2287	0.3136	0.332	0.298	0.0062	0.0062	0.0068	0.0049	0.0088	0.0039	0.0052	0.0041	0.0043
00:52:00	0.0066	0.1997	0.2403	0.2279	0.3104	0.3305	0.2962	0.0062	0.0062	0.0068	0.0049	0.0088	0.0039	0.0052	0.0041	0.0043
data from Fig.4b
time(min)	Turbidity
	1	2	3	4	5	6	7
00:00:06	0	0	0	0	0	0	0
00:00:12	0	0	0	0	0	0	0
00:00:18	0	0	0	0	0	0	0
00:00:24	0	0	0	0	0	0	0
00:00:30	0	0	0	0	0	0	0
00:00:36	0	0	0	0	0	0	0
00:00:42	0	0	0	0	0	0	0
00:00:48	0	0	0	0	0	0	0
00:00:54	0	0	0	0	0	0	0
00:01:00	0	0	0	0	0	0	0
00:01:06	0	0	0	0	0	0	0
00:01:12	0	0	0	0	0	0	0
00:01:18	0	0	0	0	0	0	0
00:01:24	0	0	0	0	0	0	0
00:01:30	0	0	0	0	0	0	0
00:01:36	0	0	0	0	0	0	0
00:01:42	0	0	0	0	0	0	0
00:01:48	0	0	0	0	0	0	0
00:01:54	0	0	0	0	0	0	0
00:02:00	0	0	0	0	0	0	0
00:02:06	0	0	0	0	0	0	0
00:02:12	0	0	0	0	0	0	0
00:02:18	0	0	0	0	0	0	0
00:02:24	0	0	0	0	0	0	0
00:02:30	0	0	0	0	0	0	0
00:02:36	0	0	0	0	0	0	0
00:02:42	0	0	0	0	0	0	0
00:02:48	0	0	0	0	0	0	0
00:02:54	0	0	0	0	0	0	0
00:03:00	0	0	0	0	0	0	0
00:03:06	0	0	0	0	0	0	0
00:03:12	0	0	0	0	0	0	0
00:03:18	0	0	0	0	0	0	0
00:03:24	0	0	0	0	0	0	0
00:03:30	0	0	0	0	0	0	0
00:03:36	0	0	0	0	0	0	0
00:03:42	0	0	0	0	0	0	0
00:03:48	0	0	0	0	0	0	0
00:03:54	0	0	0	0	0	0	0
00:04:00	0	0	0	0	0	0	0
00:04:06	0	0	0	0	0	0	0
00:04:12	0	0	0	0	0	0	0
00:04:18	0	0	0	0	0	0	0
00:04:24	0	0	0	0	0	0	0
00:04:30	0	0	0	0	0	0	0
00:04:36	0	0	0	0	0	0	0
00:04:42	0	0	0	0	0	0	0
00:04:48	0	0	0	0	0	0	0
00:04:54	0	0	0	0	0	0	0
00:05:00	0	0	0	0	0	0	0
00:05:06	0	0	0	0	0	0	0
00:05:12	0	0	0	0	0	0	0
00:05:18	0	0	0	0	0	0	0
00:05:24	0	0	0	0	0	0	0
00:05:30	0	0	0	0	0	0	0
00:05:36	0	0	0	0	0	0	0
00:05:42	0	0	0	0	0	0	0
00:05:48	0	0	0	0	0	0	0
00:05:54	0	0	0	0	0	0	0
00:06:00	0	0	0	0	0	0	0
00:06:06	0	0	0	0	0	0	0
00:06:12	0	0	0	0	0	0	0
00:06:18	0	0	0	0	0	0	0
00:06:24	0	0	0	0	0	0	0
00:06:30	0	0	0	0	0	0	0
00:06:36	0	0	0	0	0	0	0
00:06:42	0	0	0	0	0	0	0
00:06:48	0	0	0	0	0	0	0
00:06:54	0	0	0	0	0	0	0
00:07:00	0	0	0	0	0	0	0
00:07:06	0	0	0	0	0	0	0
00:07:12	0	0	0	0	0	0	0
00:07:18	0	0	0	0	0	0	0
00:07:24	0	0	0	0	0	0	0
00:07:30	0	0	0	0	0	0	0
00:07:36	0	0	0	0	0	0	0
00:07:42	0	0	0	0	0	0	0
00:07:48	0	0	0	0	0	0	0
00:07:54	0	0	0	0	0	0	0
00:08:00	0	0	0	0	0	0	0
00:08:06	0	0	0	0	0	0	0
00:08:12	0	0	0	0	0	0	0
00:08:18	0	0	0	0	0	0	0
00:08:24	0	0	0	0	0	0	0
00:08:30	0	0	0	0	0	0	0
00:08:36	0	0	0	0	0	0	0
00:08:42	0	0	0	0	0	0	0
00:08:48	0	0	0	0	0	0	0
00:08:54	0	0	0	0	0	0	0
00:09:00	0	0	0	0	0	0	0
00:09:06	0	0	0	0	0	0	0
00:09:12	0	0	0	0	0	0	0
00:09:18	0	0	0	0	0	0	0
00:09:24	0	0	0	0	0	0	0
00:09:30	0	0	0	0	0	0	0
00:09:36	0	0	0	0	0	0	0
00:09:42	0	0	0	0	0	0	0
00:09:48	0	0	0	0	0	0	0
00:09:54	0	0	0	0	0	0	0
00:10:00	0	0	0	0	0	0	0
00:10:06	0	0	0	0	0	0	0
00:10:12	0	0	0	0	0	0	0
00:10:18	0	0	0	0	0	0	0
00:10:24	0	0	0	0	0	0	0
00:10:30	0	0	0	0	0	0	0
00:10:36	0	0	0	0	0	0	0
00:10:42	0	0	0	0	0	0	0
00:10:48	0	0	0	0	0	0	0
00:10:54	0	0	0	0	0	0	0
00:11:00	0	0	0	0	0	0	0
00:11:06	0	0	0	0	0	0	0
00:11:12	0	0	0	0	0	0	0
00:11:18	0	0	0	0	0	0	0
00:11:24	0	0	0	0	0	0	0
00:11:30	0	0	0	0	0	0	0
00:11:36	0	0	0	0	0	0	0
00:11:42	0	0	0	0	0	0	0
00:11:48	0	0	0	0	0	0	0
00:11:54	0	0	0	0	0	0	0
00:12:00	0	0	0	0	0	0	0
00:12:06	0	0	0	0	0	0	0
00:12:12	0	0	0	0	0	0	0
00:12:18	0	0	0	0	0	0	0
00:12:24	0	0	0	0	0	0	0
00:12:30	0	0	0	0	0	0	0
00:12:36	0	0	0	0	0	0	0
00:12:42	0	0	0	0	0	0	0
00:12:48	0	0	0	0	0	0	0
00:12:54	0	0	0	0	0	0	0
00:13:00	0	0	0	0	0	0	0
00:13:06	0	0	0	0	0	0	0
00:13:12	0	0	0	0	0	0	0
00:13:18	0	0	0	0	0	0	0
00:13:24	0	0	0	0	0	0	0.0005
00:13:30	0	0	0	0	0	0	0.0006
00:13:36	0	0	0	0	0	0	0.0006
00:13:42	0	0	0	0	0	0	0.0009
00:13:48	0	0	0	0	0	0.0002	0.0009
00:13:54	0	0	0	0	0	0.0002	0.0009
00:14:00	0	0	0	0	0	0.0002	0.0009
00:14:06	0	0	0	0	0	0.0003	0.0009
00:14:12	0	0	0	0	0	0.0003	0.001
00:14:18	0	0	0	0	0	0.0005	0.001
00:14:24	0	0	0	0	0	0.0005	0.0011
00:14:30	0	0	0	0	0	0.0005	0.0012
00:14:36	0	0	0	0	0	0.0005	0.0012
00:14:42	0	0	0	0	0	0.0006	0.0012
00:14:48	0	0	0	0	0	0.0006	0.0019
00:14:54	0	0	0	0	0	0.0009	0.002
00:15:00	0	0	0	0	0	0.0009	0.002
00:15:06	0	0	0	0	0	0.001	0.0021
00:15:12	0	0	0	0	0	0.001	0.0022
00:15:18	0	0	0	0	0	0.0011	0.0023
00:15:24	0	0	0	0	0	0.0012	0.0027
00:15:30	0	0	0	0	0	0.0014	0.0027
00:15:36	0	0	0	0	0	0.0015	0.0027
00:15:42	0	0	0	0	0	0.0016	0.0029
00:15:48	0	0	0	0	0	0.0017	0.0029
00:15:54	0	0	0	0	0	0.0019	0.0029
00:16:00	0	0	0	0	0	0.002	0.003
00:16:06	0	0	0	0	0	0.0021	0.0031
00:16:12	0	0	0	0	0	0.0023	0.0031
00:16:18	0	0	0	0	0	0.0024	0.0032
00:16:24	0	0	0	0	0	0.0024	0.0033
00:16:30	0	0	0	0	0	0.0025	0.0034
00:16:36	0	0	0	0	0	0.0027	0.0034
00:16:42	0	0	0	0	0	0.0029	0.0035
00:16:48	0	0	0	0	0	0.003	0.0035
00:16:54	0	0	0	0	0	0.0031	0.0044
00:17:00	0	0	0	0	0	0.0031	0.0104
00:17:06	0	0	0	0	0	0.0032	0.0111
00:17:12	0	0	0	0	0	0.0032	0.0232
00:17:18	0	0	0	0	0.0001	0.0032	0.0395
00:17:24	0	0.0001	0	0	0.0004	0.0033	0.0424
00:17:30	0	0.0001	0.0001	0	0.0006	0.0059	0.0533
00:17:36	0.0001	0.0001	0.0001	0	0.0006	0.0115	0.0591
00:17:42	0.0001	0.0001	0.0001	0.0001	0.0006	0.0135	0.0668
00:17:48	0.0001	0.0001	0.0001	0.0001	0.0008	0.0262	0.0722
00:17:54	0.0001	0.0001	0.0001	0.0001	0.0008	0.0276	0.0742
00:18:00	0.0001	0.0001	0.0001	0.0001	0.0011	0.0315	0.0799
00:18:06	0.0001	0.0001	0.0001	0.0002	0.0012	0.0353	0.0841
00:18:12	0.0001	0.0001	0.0001	0.0003	0.0016	0.0416	0.0896
00:18:18	0.0001	0.0001	0.0001	0.0003	0.0016	0.0512	0.0956
00:18:24	0.0002	0.0001	0.0001	0.0004	0.0017	0.052	0.1056
00:18:30	0.0002	0.0002	0.0001	0.0005	0.0018	0.053	0.1167
00:18:36	0.0002	0.0002	0.0001	0.0005	0.0019	0.0552	0.1218
00:18:42	0.0002	0.0002	0.0001	0.0005	0.0019	0.0741	0.1287
00:18:48	0.0002	0.0002	0.0002	0.0007	0.002	0.0806	0.1319
00:18:54	0.0002	0.0002	0.0002	0.0008	0.002	0.0849	0.1368
00:19:00	0.0002	0.0002	0.0002	0.0011	0.002	0.0873	0.1497
00:19:06	0.0002	0.0002	0.0002	0.0011	0.0022	0.0998	0.1571
00:19:12	0.0002	0.0002	0.0002	0.0018	0.0021	0.1023	0.1621
00:19:18	0.0002	0.0002	0.0002	0.002	0.0021	0.1154	0.1674
00:19:24	0.0002	0.0003	0.0002	0.002	0.0134	0.118	0.1783
00:19:30	0.0002	0.0003	0.0002	0.0021	0.0152	0.1243	0.18
00:19:36	0.0003	0.0003	0.0002	0.0021	0.0163	0.1274	0.1809
00:19:42	0.0003	0.0003	0.0002	0.0026	0.0203	0.1388	0.1957
00:19:48	0.0003	0.0003	0.0002	0.0028	0.0274	0.1392	0.1997
00:19:54	0.0003	0.0003	0.0002	0.0029	0.0325	0.1413	0.2031
00:20:00	0.0003	0.0003	0.0002	0.0035	0.0436	0.1438	0.2037
00:20:06	0.0003	0.0003	0.0003	0.0037	0.0483	0.1455	0.2073
00:20:12	0.0003	0.0003	0.0003	0.0037	0.0532	0.1476	0.2142
00:20:18	0.0003	0.0004	0.0003	0.0038	0.0713	0.1493	0.2154
00:20:24	0.0003	0.0004	0.0003	0.0039	0.0787	0.156	0.2209
00:20:30	0.0004	0.0004	0.0003	0.004	0.0828	0.1662	0.2227
00:20:36	0.0004	0.0004	0.0003	0.0055	0.0889	0.1693	0.2254
00:20:42	0.0004	0.0005	0.0003	0.0104	0.1004	0.171	0.2322
00:20:48	0.0004	0.0005	0.0003	0.0135	0.1041	0.1742	0.2375
00:20:54	0.0004	0.0005	0.0003	0.0253	0.1175	0.1842	0.2466
00:21:00	0.0004	0.0005	0.0003	0.0294	0.1177	0.1937	0.2503
00:21:06	0.0004	0.0005	0.0003	0.0354	0.1253	0.1943	0.254
00:21:12	0.0004	0.0005	0.0004	0.0362	0.1262	0.1959	0.2551
00:21:18	0.0004	0.0005	0.0007	0.0466	0.128	0.1973	0.2631
00:21:24	0.0004	0.0005	0.0007	0.0485	0.1356	0.2027	0.2633
00:21:30	0.0005	0.0006	0.0008	0.0553	0.1394	0.2057	0.2711
00:21:36	0.0005	0.0006	0.001	0.0606	0.1433	0.2062	0.2718
00:21:42	0.0005	0.0006	0.001	0.0608	0.1523	0.2094	0.2725
00:21:48	0.0005	0.0006	0.0011	0.0633	0.1547	0.2141	0.2792
00:21:54	0.0005	0.0007	0.0012	0.071	0.1581	0.2194	0.2823
00:22:00	0.0005	0.0007	0.0015	0.0761	0.1678	0.2365	0.2853
00:22:06	0.0005	0.0007	0.0015	0.0788	0.1691	0.2408	0.2869
00:22:12	0.0005	0.0007	0.0016	0.0797	0.1801	0.2417	0.2876
00:22:18	0.0005	0.0007	0.0017	0.0907	0.1867	0.2443	0.2895
00:22:24	0.0005	0.0007	0.0017	0.0937	0.1903	0.2498	0.2912
00:22:30	0.0005	0.0007	0.0019	0.1007	0.1911	0.2505	0.2953
00:22:36	0.0006	0.0007	0.0021	0.1007	0.2016	0.26	0.2962
00:22:42	0.0006	0.0007	0.0022	0.1103	0.2069	0.262	0.3082
00:22:48	0.0006	0.0007	0.0022	0.1151	0.2088	0.2639	0.3089
00:22:54	0.0006	0.0008	0.0024	0.1173	0.2095	0.2651	0.3103
00:23:00	0.0006	0.0008	0.0024	0.1194	0.2123	0.2727	0.3122
00:23:06	0.0006	0.0008	0.0027	0.1217	0.2237	0.2764	0.3138
00:23:12	0.0006	0.0008	0.0027	0.1257	0.2268	0.2778	0.3156
00:23:18	0.0006	0.0009	0.0036	0.1292	0.2293	0.2792	0.3156
00:23:24	0.0006	0.0009	0.004	0.1331	0.2296	0.2803	0.3193
00:23:30	0.0006	0.0009	0.0041	0.1352	0.24	0.2846	0.3239
00:23:36	0.0007	0.001	0.0041	0.1369	0.241	0.2939	0.3285
00:23:42	0.0007	0.001	0.0042	0.1399	0.2436	0.2957	0.3287
00:23:48	0.0007	0.001	0.0091	0.1413	0.2448	0.2962	0.3349
00:23:54	0.0007	0.001	0.0186	0.1579	0.2476	0.2992	0.3361
00:24:00	0.0007	0.001	0.0207	0.1598	0.2488	0.304	0.3389
00:24:06	0.0007	0.001	0.0318	0.1607	0.249	0.3047	0.3437
00:24:12	0.0007	0.001	0.0421	0.1712	0.2535	0.3085	0.3476
00:24:18	0.0008	0.001	0.0425	0.1783	0.2545	0.3128	0.3502
00:24:24	0.0008	0.001	0.0491	0.1787	0.2597	0.3151	0.3532
00:24:30	0.0008	0.001	0.0512	0.182	0.2631	0.3167	0.3542
00:24:36	0.0008	0.001	0.0514	0.1855	0.2655	0.3168	0.3553
00:24:42	0.0008	0.001	0.0522	0.1914	0.2689	0.318	0.3565
00:24:48	0.0008	0.001	0.0577	0.1915	0.2724	0.3267	0.3576
00:24:54	0.0009	0.001	0.0588	0.1927	0.28	0.3273	0.3586
00:25:00	0.0009	0.001	0.064	0.1972	0.2803	0.3308	0.3606
00:25:06	0.0009	0.0011	0.0666	0.1976	0.2817	0.3308	0.3613
00:25:12	0.0009	0.0011	0.0678	0.202	0.2831	0.3321	0.3643
00:25:18	0.0009	0.0011	0.0783	0.211	0.2882	0.3322	0.365
00:25:24	0.0009	0.0011	0.0803	0.221	0.2904	0.3333	0.3672
00:25:30	0.0009	0.0011	0.0881	0.2218	0.2939	0.3378	0.3682
00:25:36	0.0009	0.0011	0.0963	0.2257	0.2949	0.34	0.3687
00:25:42	0.0009	0.0011	0.0971	0.226	0.2979	0.3466	0.3694
00:25:48	0.001	0.0011	0.1	0.2261	0.3009	0.3478	0.3725
00:25:54	0.001	0.0012	0.1018	0.2261	0.3016	0.348	0.3782
00:26:00	0.001	0.0012	0.1032	0.2311	0.3089	0.3538	0.3791
00:26:06	0.001	0.0012	0.1083	0.2368	0.3106	0.3545	0.3797
00:26:12	0.001	0.0012	0.1086	0.2415	0.3186	0.3559	0.3828
00:26:18	0.001	0.0012	0.1105	0.2435	0.322	0.3643	0.3834
00:26:24	0.001	0.0013	0.1132	0.245	0.3223	0.3646	0.3864
00:26:30	0.001	0.0013	0.1146	0.2488	0.3258	0.3647	0.3889
00:26:36	0.001	0.0013	0.1247	0.2511	0.3263	0.3699	0.3892
00:26:42	0.001	0.0013	0.1285	0.2528	0.3273	0.3705	0.3907
00:26:48	0.001	0.0013	0.1336	0.2531	0.329	0.371	0.3911
00:26:54	0.001	0.0013	0.1404	0.2541	0.3314	0.3726	0.393
00:27:00	0.001	0.0013	0.1413	0.262	0.3327	0.3743	0.3952
00:27:06	0.001	0.0013	0.149	0.262	0.3332	0.3797	0.3979
00:27:12	0.001	0.0014	0.1541	0.2634	0.3353	0.3799	0.3985
00:27:18	0.0011	0.0014	0.1548	0.2653	0.3356	0.3817	0.4022
00:27:24	0.0011	0.0014	0.1549	0.2657	0.3409	0.3834	0.4038
00:27:30	0.0011	0.0014	0.1593	0.2688	0.3436	0.3849	0.4042
00:27:36	0.0011	0.0014	0.1662	0.2731	0.3443	0.3877	0.4045
00:27:42	0.0011	0.0014	0.1674	0.2752	0.3456	0.3878	0.4047
00:27:48	0.0011	0.0015	0.1722	0.2828	0.3498	0.3882	0.4048
00:27:54	0.0011	0.0015	0.1733	0.287	0.351	0.3903	0.4086
00:28:00	0.0011	0.0015	0.1737	0.2889	0.354	0.3923	0.4098
00:28:06	0.0011	0.0016	0.1744	0.2927	0.3556	0.393	0.4098
00:28:12	0.0012	0.0017	0.1779	0.2958	0.356	0.3945	0.4101
00:28:18	0.0012	0.0017	0.1812	0.2961	0.3573	0.3953	0.4108
00:28:24	0.0012	0.0017	0.1813	0.2995	0.3617	0.397	0.4126
00:28:30	0.0013	0.0017	0.1822	0.3007	0.3636	0.3975	0.4148
00:28:36	0.0013	0.0017	0.1918	0.3031	0.3643	0.3997	0.4156
00:28:42	0.0013	0.0018	0.1991	0.3067	0.3672	0.4017	0.4178
00:28:48	0.0013	0.0018	0.2001	0.3094	0.3701	0.4041	0.4181
00:28:54	0.0013	0.0018	0.2057	0.3124	0.3731	0.4073	0.4181
00:29:00	0.0013	0.0018	0.2059	0.3152	0.3756	0.408	0.4204
00:29:06	0.0013	0.0018	0.2142	0.3219	0.3778	0.4101	0.4213
00:29:12	0.0013	0.0018	0.2175	0.3227	0.3779	0.4109	0.4229
00:29:18	0.0013	0.0018	0.219	0.3257	0.3795	0.4115	0.4232
00:29:24	0.0013	0.0018	0.2205	0.3262	0.381	0.4135	0.4233
00:29:30	0.0014	0.0018	0.2227	0.3264	0.381	0.417	0.4275
00:29:36	0.0014	0.0019	0.225	0.3267	0.3845	0.4172	0.4278
00:29:42	0.0014	0.0019	0.2252	0.3298	0.3904	0.4182	0.4287
00:29:48	0.0014	0.0019	0.229	0.3321	0.3905	0.4186	0.4297
00:29:54	0.0015	0.0019	0.2317	0.3366	0.3924	0.4205	0.4302
00:30:00	0.0015	0.0019	0.2327	0.3381	0.3945	0.4226	0.431
00:30:06	0.0015	0.0019	0.2338	0.3416	0.3972	0.424	0.4312
00:30:12	0.0015	0.0019	0.2356	0.3421	0.3974	0.4264	0.4324
00:30:18	0.0015	0.002	0.2461	0.3445	0.3977	0.4266	0.4332
00:30:24	0.0015	0.002	0.2482	0.3461	0.3987	0.4271	0.4335
00:30:30	0.0015	0.002	0.2539	0.3484	0.4005	0.4296	0.4346
00:30:36	0.0015	0.002	0.2553	0.3505	0.4011	0.4296	0.438
00:30:42	0.0015	0.002	0.2553	0.3538	0.4013	0.4315	0.4385
00:30:48	0.0016	0.002	0.2589	0.3581	0.4019	0.4325	0.439
00:30:54	0.0016	0.002	0.2599	0.359	0.4076	0.4326	0.4394
00:31:00	0.0016	0.002	0.2601	0.3595	0.4092	0.434	0.4394
00:31:06	0.0016	0.0021	0.2616	0.36	0.4099	0.4342	0.4398
00:31:12	0.0016	0.0021	0.2662	0.3605	0.4126	0.4382	0.4401
00:31:18	0.0016	0.0021	0.2667	0.3656	0.4134	0.4383	0.4411
00:31:24	0.0016	0.0021	0.2686	0.3661	0.4146	0.4396	0.4425
00:31:30	0.0016	0.0021	0.2714	0.3668	0.4147	0.4404	0.4429
00:31:36	0.0016	0.0021	0.2772	0.3674	0.4148	0.441	0.4432
00:31:42	0.0016	0.0021	0.2795	0.3703	0.4166	0.4413	0.4433
00:31:48	0.0016	0.0022	0.2822	0.3707	0.4184	0.4424	0.4435
00:31:54	0.0016	0.0022	0.2845	0.3722	0.4187	0.443	0.4444
00:32:00	0.0016	0.0022	0.2852	0.3772	0.4217	0.4439	0.4454
00:32:06	0.0017	0.0022	0.2853	0.3781	0.4221	0.4442	0.4463
00:32:12	0.0017	0.0022	0.2877	0.3801	0.4225	0.445	0.4466
00:32:18	0.0017	0.0022	0.2885	0.3808	0.4232	0.4452	0.4468
00:32:24	0.0017	0.0023	0.2886	0.382	0.4236	0.4456	0.4474
00:32:30	0.0017	0.0023	0.2951	0.3843	0.4259	0.4458	0.4475
00:32:36	0.0017	0.0023	0.3	0.3844	0.4266	0.4463	0.4488
00:32:42	0.0017	0.0023	0.3015	0.3859	0.427	0.4474	0.4492
00:32:48	0.0017	0.0023	0.3029	0.388	0.4302	0.4482	0.4497
00:32:54	0.0017	0.0023	0.303	0.389	0.4315	0.4514	0.4499
00:33:00	0.0018	0.0024	0.3038	0.3906	0.4322	0.4517	0.4512
00:33:06	0.0018	0.0024	0.3041	0.3908	0.4332	0.4519	0.4528
00:33:12	0.0018	0.0024	0.3046	0.3915	0.4333	0.4531	0.4529
00:33:18	0.0018	0.0024	0.3059	0.3922	0.4344	0.4538	0.4529
00:33:24	0.0018	0.0024	0.3067	0.3928	0.4344	0.4547	0.4532
00:33:30	0.0019	0.0024	0.3102	0.393	0.4361	0.4548	0.4533
00:33:36	0.0019	0.0024	0.3119	0.3951	0.4363	0.4551	0.4541
00:33:42	0.0019	0.0024	0.3133	0.3955	0.437	0.4557	0.4556
00:33:48	0.0019	0.0024	0.3137	0.3956	0.4397	0.456	0.4558
00:33:54	0.0019	0.0024	0.3149	0.3973	0.4401	0.4585	0.4564
00:34:00	0.002	0.0025	0.3164	0.3983	0.4414	0.459	0.4564
00:34:06	0.002	0.0025	0.3187	0.3983	0.4421	0.4591	0.4572
00:34:12	0.002	0.0025	0.3192	0.3984	0.4437	0.4593	0.4573
00:34:18	0.002	0.0025	0.3202	0.3985	0.4453	0.4594	0.4574
00:34:24	0.002	0.0025	0.3208	0.4033	0.4462	0.4599	0.4575
00:34:30	0.002	0.0025	0.3211	0.4033	0.4465	0.4612	0.4577
00:34:36	0.002	0.0026	0.3229	0.4036	0.4475	0.4613	0.4579
00:34:42	0.002	0.0026	0.3231	0.4049	0.448	0.4617	0.4586
00:34:48	0.002	0.0026	0.3245	0.407	0.448	0.4619	0.4592
00:34:54	0.0021	0.0026	0.3258	0.4071	0.4482	0.4619	0.4593
00:35:00	0.0021	0.0026	0.3259	0.4074	0.4482	0.4646	0.4616
00:35:06	0.0021	0.0026	0.3265	0.4076	0.4485	0.465	0.4617
00:35:12	0.0022	0.0026	0.3282	0.4079	0.4495	0.4652	0.4626
00:35:18	0.0022	0.0026	0.3286	0.4091	0.4497	0.4653	0.4628
00:35:24	0.0022	0.0026	0.3287	0.4117	0.4507	0.4659	0.4628
00:35:30	0.0023	0.0026	0.329	0.4119	0.4511	0.4662	0.4632
00:35:36	0.0023	0.0026	0.3321	0.4125	0.4519	0.4668	0.4641
00:35:42	0.0023	0.0026	0.3321	0.4128	0.4526	0.4673	0.4644
00:35:48	0.0023	0.0027	0.3327	0.4131	0.453	0.4681	0.4653
00:35:54	0.0024	0.0027	0.3327	0.4133	0.4534	0.4684	0.4654
00:36:00	0.0024	0.0027	0.3333	0.4133	0.4543	0.4697	0.4661
00:36:06	0.0024	0.0027	0.3335	0.4133	0.4545	0.4697	0.4662
00:36:12	0.0024	0.0028	0.3335	0.4137	0.4557	0.4697	0.4666
00:36:18	0.0024	0.0028	0.3343	0.4142	0.4558	0.4709	0.4668
00:36:24	0.0024	0.0028	0.335	0.4143	0.4562	0.4713	0.467
00:36:30	0.0024	0.0028	0.336	0.4144	0.4567	0.4719	0.4673
00:36:36	0.0024	0.0028	0.3371	0.4164	0.4575	0.472	0.4676
00:36:42	0.0024	0.0029	0.3375	0.4169	0.4575	0.4725	0.4678
00:36:48	0.0024	0.0029	0.3386	0.4177	0.4578	0.4732	0.4688
00:36:54	0.0025	0.0029	0.3389	0.4184	0.4578	0.4736	0.4699
00:37:00	0.0025	0.003	0.3415	0.4184	0.4591	0.4747	0.4703
00:37:06	0.0025	0.003	0.3416	0.4199	0.4598	0.4749	0.4712
00:37:12	0.0025	0.003	0.3424	0.4201	0.4601	0.4753	0.4719
00:37:18	0.0025	0.003	0.3427	0.4202	0.4603	0.4757	0.4719
00:37:24	0.0025	0.003	0.3433	0.4202	0.4607	0.4758	0.4726
00:37:30	0.0025	0.003	0.3437	0.4211	0.4615	0.4768	0.4728
00:37:36	0.0026	0.003	0.3438	0.4217	0.4617	0.4773	0.4728
00:37:42	0.0026	0.003	0.3443	0.4225	0.4618	0.4775	0.4731
00:37:48	0.0026	0.003	0.3446	0.4226	0.462	0.4776	0.4736
00:37:54	0.0026	0.003	0.3453	0.4233	0.462	0.4777	0.4736
00:38:00	0.0026	0.003	0.3462	0.4235	0.4621	0.4781	0.4736
00:38:06	0.0026	0.0031	0.3462	0.4236	0.4622	0.4781	0.4735
00:38:12	0.0026	0.0031	0.3467	0.424	0.463	0.4784	0.4735
00:38:18	0.0026	0.0031	0.3468	0.4245	0.4632	0.4784	0.4734
00:38:24	0.0026	0.0031	0.347	0.4247	0.4635	0.4785	0.4734
00:38:30	0.0026	0.0031	0.3474	0.4249	0.4637	0.4788	0.4734
00:38:36	0.0026	0.0031	0.3487	0.425	0.4638	0.4788	0.4732
00:38:42	0.0026	0.0031	0.349	0.4257	0.4638	0.479	0.4731
00:38:48	0.0026	0.0031	0.3497	0.4288	0.4644	0.4792	0.4729
00:38:54	0.0026	0.0031	0.3509	0.4288	0.4655	0.4794	0.4728
00:39:00	0.0027	0.0031	0.3524	0.429	0.4667	0.4796	0.4726
00:39:06	0.0027	0.0032	0.3525	0.429	0.4673	0.4792	0.4724
00:39:12	0.0027	0.0032	0.3527	0.4298	0.4675	0.4787	0.472
00:39:18	0.0027	0.0032	0.353	0.4306	0.4675	0.4787	0.4719
00:39:24	0.0027	0.0032	0.3533	0.4306	0.4676	0.4785	0.4717
00:39:30	0.0027	0.0032	0.3535	0.4307	0.4682	0.4785	0.4715
00:39:36	0.0027	0.0032	0.3536	0.4311	0.4685	0.4784	0.4712
00:39:42	0.0028	0.0033	0.3537	0.4318	0.4687	0.4784	0.4711
00:39:48	0.0028	0.0033	0.3547	0.4319	0.4692	0.4784	0.4709
00:39:54	0.0028	0.0033	0.3554	0.4333	0.4692	0.4783	0.4707
00:40:00	0.0028	0.0033	0.3576	0.4333	0.4692	0.4783	0.4706
00:40:06	0.0028	0.0033	0.3581	0.4339	0.47	0.4783	0.4705
00:40:12	0.0029	0.0034	0.3584	0.4343	0.4706	0.4782	0.4704
00:40:18	0.0029	0.0034	0.3584	0.4344	0.4714	0.4782	0.4703
00:40:24	0.0029	0.0034	0.3586	0.435	0.4715	0.478	0.4703
00:40:30	0.0029	0.0034	0.3587	0.4354	0.4717	0.4775	0.4702
00:40:36	0.0029	0.0034	0.3591	0.4358	0.4721	0.4775	0.4701
00:40:42	0.0029	0.0034	0.3597	0.436	0.4721	0.4774	0.4699
00:40:48	0.0029	0.0034	0.3608	0.4371	0.4726	0.4773	0.4682
00:40:54	0.0029	0.0034	0.3616	0.4378	0.4734	0.477	0.4678
00:41:00	0.0029	0.0034	0.3616	0.4382	0.4746	0.477	0.4671
00:41:06	0.0029	0.0034	0.362	0.4384	0.4749	0.4768	0.4669
00:41:12	0.0029	0.0035	0.3621	0.4385	0.475	0.4768	0.4662
00:41:18	0.0029	0.0035	0.3624	0.4387	0.4755	0.4763	0.4651
00:41:24	0.003	0.0035	0.3624	0.439	0.4756	0.4763	0.4643
00:41:30	0.003	0.0035	0.3627	0.439	0.4756	0.4762	0.463
00:41:36	0.003	0.0035	0.3633	0.4395	0.4757	0.4758	0.4629
00:41:42	0.003	0.0036	0.3633	0.4395	0.4761	0.4756	0.4615
00:41:48	0.0031	0.0036	0.3634	0.4405	0.4762	0.4756	0.4604
00:41:54	0.0031	0.0036	0.3641	0.4405	0.4762	0.4754	0.4593
00:42:00	0.0031	0.0036	0.3645	0.4406	0.4762	0.4753	0.4589
00:42:06	0.0031	0.0036	0.3647	0.441	0.4763	0.4752	0.4573
00:42:12	0.0031	0.0036	0.365	0.4412	0.4783	0.4748	0.4561
00:42:18	0.0031	0.0036	0.3651	0.4414	0.4785	0.4747	0.4553
00:42:24	0.0031	0.0037	0.3652	0.4418	0.4785	0.4746	0.4542
00:42:30	0.0031	0.0037	0.3656	0.4419	0.4785	0.4744	0.4539
00:42:36	0.0031	0.0037	0.3657	0.442	0.4786	0.4742	0.4533
00:42:42	0.0032	0.0037	0.3664	0.4422	0.4792	0.474	0.4523
00:42:48	0.0032	0.0037	0.3667	0.4422	0.4792	0.4735	0.4511
00:42:54	0.0032	0.0037	0.3673	0.4422	0.4793	0.4734	0.4496
00:43:00	0.0032	0.0038	0.3684	0.4425	0.4797	0.473	0.4485
00:43:06	0.0032	0.0038	0.3693	0.4431	0.4797	0.4724	0.4482
00:43:12	0.0032	0.0038	0.3694	0.4431	0.4797	0.4721	0.4476
00:43:18	0.0032	0.0038	0.3698	0.4435	0.4798	0.472	0.4474
00:43:24	0.0032	0.0038	0.3708	0.4445	0.4798	0.4719	0.4461
00:43:30	0.0032	0.0038	0.371	0.4445	0.4799	0.4709	0.4455
00:43:36	0.0033	0.0038	0.3712	0.4451	0.4799	0.4705	0.4433
00:43:42	0.0033	0.0038	0.3718	0.4452	0.4799	0.4702	0.4427
00:43:48	0.0033	0.0039	0.3719	0.4455	0.4799	0.4693	0.4419
00:43:54	0.0033	0.0039	0.3721	0.446	0.48	0.4681	0.4401
00:44:00	0.0033	0.0039	0.3724	0.446	0.4801	0.468	0.4392
00:44:06	0.0033	0.0039	0.3726	0.4461	0.478	0.4678	0.4369
00:44:12	0.0033	0.0039	0.3729	0.4461	0.4773	0.4666	0.4347
00:44:18	0.0033	0.004	0.3731	0.4469	0.477	0.4662	0.4326
00:44:24	0.0033	0.004	0.3739	0.4473	0.4769	0.4659	0.4314
00:44:30	0.0033	0.004	0.3744	0.4474	0.4768	0.465	0.4301
00:44:36	0.0034	0.0041	0.3755	0.4475	0.4763	0.4638	0.4292
00:44:42	0.0034	0.0041	0.3767	0.448	0.4762	0.4634	0.4275
00:44:48	0.0034	0.0041	0.3777	0.4485	0.4759	0.4593	0.4261
00:44:54	0.0034	0.0041	0.3789	0.4485	0.4758	0.4561	0.4223
00:45:00	0.0034	0.0041	0.3801	0.4488	0.4757	0.4529	0.4183
00:45:06	0.0034	0.0041	0.3808	0.4486	0.4757	0.4522	0.4156
00:45:12	0.0034	0.0041	0.3813	0.4481	0.4754	0.4519	0.4136
00:45:18	0.0034	0.0041	0.3826	0.4479	0.4751	0.4512	0.4071
00:45:24	0.0034	0.0042	0.383	0.4479	0.4751	0.4485	0.4057
00:45:30	0.0034	0.0042	0.3831	0.4465	0.4747	0.4471	0.4016
00:45:36	0.0035	0.0042	0.3834	0.4458	0.4747	0.4469	0.3992
00:45:42	0.0035	0.0042	0.3839	0.445	0.4743	0.4445	0.3971
00:45:48	0.0035	0.0042	0.384	0.445	0.4736	0.4418	0.3961
00:45:54	0.0035	0.0042	0.3843	0.4449	0.4733	0.4399	0.3953
00:46:00	0.0035	0.0042	0.3843	0.4447	0.4723	0.4378	0.3893
00:46:06	0.0035	0.0043	0.3849	0.4446	0.4703	0.4353	0.3877
00:46:12	0.0035	0.0043	0.3854	0.4444	0.4677	0.4329	0.3843
00:46:18	0.0035	0.0043	0.3855	0.4435	0.4661	0.4317	0.3837
00:46:24	0.0035	0.0043	0.3859	0.4419	0.4656	0.4296	0.3796
00:46:30	0.0035	0.0043	0.3861	0.4419	0.4631	0.4284	0.3793
00:46:36	0.0036	0.0043	0.3869	0.4415	0.4625	0.4277	0.3782
00:46:42	0.0036	0.0043	0.387	0.4412	0.4598	0.4268	0.3772
00:46:48	0.0036	0.0043	0.3871	0.4409	0.4594	0.4241	0.376
00:46:54	0.0036	0.0043	0.3872	0.4399	0.4584	0.4219	0.3759
00:47:00	0.0036	0.0044	0.3878	0.4378	0.4577	0.4193	0.3712
00:47:06	0.0036	0.0044	0.3878	0.4372	0.4572	0.4133	0.3692
00:47:12	0.0036	0.0044	0.388	0.4344	0.453	0.4115	0.3671
00:47:18	0.0037	0.0044	0.3886	0.4343	0.4526	0.4098	0.3652
00:47:24	0.0037	0.0044	0.3886	0.434	0.4492	0.4092	0.3637
00:47:30	0.0037	0.0045	0.3887	0.4336	0.4489	0.4047	0.3626
00:47:36	0.0037	0.0045	0.3889	0.4332	0.4458	0.4045	0.3626
00:47:42	0.0037	0.0045	0.3893	0.4328	0.4441	0.4043	0.3597
00:47:48	0.0037	0.0045	0.3897	0.4323	0.4434	0.4007	0.3555
00:47:54	0.0037	0.0045	0.3897	0.4285	0.4411	0.4004	0.3532
00:48:00	0.0037	0.0045	0.3897	0.4271	0.4403	0.3988	0.3519
00:48:06	0.0037	0.0046	0.3897	0.4242	0.4375	0.3987	0.3419
00:48:12	0.0037	0.0046	0.3897	0.4241	0.435	0.3979	0.341
00:48:18	0.0037	0.0046	0.3897	0.4231	0.4302	0.3952	0.3399
00:48:24	0.0038	0.0046	0.3899	0.4231	0.4295	0.3924	0.3389
00:48:30	0.0038	0.0046	0.3902	0.4213	0.4292	0.3913	0.3382
00:48:36	0.0038	0.0046	0.3903	0.4213	0.4289	0.3896	0.3368
00:48:42	0.0038	0.0047	0.3905	0.4201	0.4279	0.3863	0.3362
00:48:48	0.0039	0.0047	0.3909	0.4194	0.4251	0.3862	0.3357
00:48:54	0.0039	0.0047	0.3912	0.4194	0.4231	0.3818	0.3349
00:49:00	0.0039	0.0047	0.3912	0.4186	0.4187	0.3796	0.3325
00:49:06	0.0039	0.0047	0.3908	0.4185	0.4186	0.3777	0.328
00:49:12	0.0039	0.0048	0.3908	0.4165	0.4166	0.3755	0.3266
00:49:18	0.0039	0.0048	0.3906	0.4142	0.4135	0.3707	0.3254
00:49:24	0.0039	0.0048	0.3906	0.4139	0.4126	0.3701	0.324
00:49:30	0.0039	0.0048	0.3905	0.4119	0.4101	0.3701	0.3238
00:49:36	0.0039	0.0048	0.3905	0.4118	0.4069	0.3694	0.3236
00:49:42	0.0039	0.0048	0.3902	0.4113	0.4023	0.369	0.3199
00:49:48	0.0039	0.0048	0.39	0.411	0.4016	0.3682	0.3182
00:49:54	0.004	0.0048	0.3899	0.4094	0.4004	0.361	0.3165
00:50:00	0.004	0.0048	0.3899	0.4084	0.3996	0.3605	0.3132
00:50:06	0.004	0.0048	0.3899	0.408	0.3979	0.3584	0.3113
00:50:12	0.004	0.0048	0.3891	0.4068	0.3906	0.3577	0.3098
00:50:18	0.004	0.0048	0.389	0.4049	0.3799	0.3563	0.3058
00:50:24	0.004	0.0049	0.389	0.4045	0.3789	0.356	0.3046
00:50:30	0.004	0.0049	0.3883	0.4024	0.3783	0.3553	0.3006
00:50:36	0.004	0.0049	0.3875	0.4023	0.3747	0.3512	0.2982
00:50:42	0.004	0.0049	0.3871	0.4007	0.3727	0.3502	0.2977
00:50:48	0.0041	0.0049	0.386	0.3997	0.3724	0.3488	0.2971
00:50:54	0.0041	0.0049	0.3858	0.3989	0.3724	0.3478	0.2953
00:51:00	0.0041	0.0049	0.3852	0.3987	0.372	0.3436	0.2951
00:51:06	0.0041	0.0049	0.383	0.3984	0.3687	0.3415	0.293
00:51:12	0.0041	0.0049	0.3823	0.3957	0.368	0.339	0.2925
00:51:18	0.0041	0.0049	0.3819	0.3954	0.3666	0.3375	0.2921
00:51:24	0.0041	0.005	0.3733	0.392	0.364	0.3373	0.2898
00:51:30	0.0042	0.005	0.3728	0.3892	0.3613	0.3368	0.2896
00:51:36	0.0042	0.005	0.3726	0.3887	0.3584	0.335	0.2879
00:51:42	0.0042	0.005	0.3693	0.3881	0.3561	0.3337	0.2876
00:51:48	0.0042	0.005	0.3676	0.3822	0.3559	0.3315	0.287
00:51:54	0.0042	0.005	0.3652	0.3796	0.3551	0.3304	0.2782
00:52:00	0.0042	0.0051	0.3651	0.3793	0.3532	0.3254	0.2772
